# Supplementary material for: Topological transformation of microbial proteins into iron single-atom sites for selective hydrogen peroxide electrosynthesis
Source: PubMed Central journal article supplement — Nat Commun. 2024 Dec 30;15:10758. doi: 10.1038/s41467-024-55041-z (PMC11685441; doi:10.1038/s41467-024-55041-z), 2024-12-30
Supplement: 41467_2024_55041_MOESM1_ESM.pdf [file 41467_2024_55041_MOESM1_ESM.pdf]

---

1 **Supplementary Information**

2 **Topological transformation of microbial proteins into iron single-atom sites**  
3 **for selective hydrogen peroxide electrosynthesis**

4 Xiaofeng Xiao<sup>1, 2\*</sup>, Zechao Zhuang<sup>3, 4\*</sup>, Shuhu Yin<sup>5</sup>, Jiexin Zhu<sup>6</sup>, Tao Gan<sup>7</sup>, Ruohan Yu<sup>8</sup>,  
5 Jinsong Wu<sup>8</sup>, Xiaochun Tian<sup>1</sup>, Yanxia Jiang<sup>5</sup>, Dingsheng Wang<sup>3</sup><sup>✉</sup> and Feng Zhao<sup>1</sup><sup>✉</sup>

6 <sup>1</sup>Key Laboratory of Urban Pollutant Conversion, Institute of Urban Environment, Chinese  
7 Academy of Sciences, Xiamen 361021, China

8 <sup>2</sup>University of Chinese Academy of Sciences, Beijing 100049, China

9 <sup>3</sup>Department of Chemistry, Tsinghua University, Beijing 100084, China

10 <sup>4</sup>Department of Chemical Engineering, Columbia University, New York, NY, 10027, USA

11 <sup>5</sup>College of Chemistry and Chemical Engineering, Discipline of Intelligent Instrument and  
12 Equipment, Xiamen University, Xiamen 361005, China

13 <sup>6</sup>State Key Laboratory of Advanced Technology for Materials Synthesis and Processing,  
14 Wuhan University of Technology, Wuhan 430070, China

15 <sup>7</sup>Shanghai Synchrotron Radiation Facility, Shanghai Advanced Research Institute, Chinese  
16 Academy of Sciences, Shanghai 202104, China

17 <sup>8</sup>Nanostructure Research Centre, Wuhan University of Technology, Wuhan 430070, China

18 \*These authors contributed equally: Xiaofeng Xiao and Zechao Zhuang

19 ✉e-mail: [fzhao@iue.ac.cn](mailto:fzhao@iue.ac.cn); [wangdingsheng@mail.tsinghua.edu.cn](mailto:wangdingsheng@mail.tsinghua.edu.cn)

20

---

21 The **Supporting Information** contains 51 pages, 46 Supplementary figures, 5 tables, and 5  
22 Supplementary References.  
23

24 **Supplementary Figure 1** | RRDE collection efficiency calibration.

25 **Supplementary Figure 2** | ORR electrochemical performances of various microbe-derived  
26 carbon materials. **a**, polarization curves for ORR. **b**, Calculated H<sub>2</sub>O<sub>2</sub> selectivity. **c**, electron  
27 transfer number.

28 **Supplementary Figure 3** | The content of the predominant metal elements in microorganisms  
29 (hollow) and the corresponding derived carbon materials (solid fill pattern) measured by ICP-  
30 MS.

31 **Supplementary Figure 4** | The STEM image and elemental distribution maps of *Escherichia*  
32 *coli*-derived carbon material.

33 **Supplementary Figure 5** | The STEM image and elemental distribution maps of *Shewanella*  
34 *oneidensis*-derived carbon material.

35 **Supplementary Figure 6** | The STEM image and elemental distribution maps of *Halomonas*  
36 *titanicae*-derived carbon material.

37 **Supplementary Figure 7** | The STEM image and elemental distribution maps of *Pseudomonas*  
38 *aeruginosa*-derived carbon material.

39 **Supplementary Figure 8** | The STEM image and elemental distribution maps of *Cupriavidus*  
40 *necator*-derived carbon material.

41 **Supplementary Figure 9** | The STEM image and elemental distribution maps of *Eubacterium*  
42 *limosum*-derived carbon material.

43 **Supplementary Figure 10** | The STEM image and elemental distribution maps of  
44 *Lactobacillus acidophilus*-derived carbon material.

45 **Supplementary Figure 11** | The STEM image and elemental distribution maps of *Bacillus*  
46 *thuringiensis*-derived carbon material.

47 **Supplementary Figure 12** | The STEM image and elemental distribution maps of *Bacillus*  
48 *subtilis*-derived carbon material.

49 **Supplementary Figure 13** | The AC-STEM images and elemental distribution maps of  
50 *Bacillus pumilus*-derived carbon material. **a**, Dark field image, **b**, High resolution HAADF-  
51 STEM image and **c**, Elemental distribution map.

52 **Supplementary Figure 14** | The STEM image and elemental distribution maps of  
53 *Saccharomyces cerevisiae*-derived carbon material.

54 **Supplementary Figure 15** | The morphology of *Bacillus pumilus* and *Bacillus pumilus*(Fe<sup>-</sup>).

---

55 **Supplementary Figure 16** | The content of metal elements in *Bacillus pumilus*, *Bacillus*  
56 *pumilus*(Fe<sup>-</sup>), *Bacillus pumilus*-derived carbon material and *Bacillus pumilus*(Fe<sup>-</sup>)-derived  
57 carbon material.

58 **Supplementary Figure 17** | The STEM and elemental distribution map of *Bacillus*  
59 *pumilus*(Fe<sup>-</sup>)-derived carbon material.

60 **Supplementary Figure 18** | XPS spectra of *Bacillus pumilus*-derived carbon material (top)  
61 and *Bacillus pumilus*(Fe<sup>-</sup>)-derived carbon material (down).

62 **Supplementary Figure 19** | ORR electrochemical performance of *Bacillus pumilus*-derived  
63 carbon material and *Bacillus pumilus*(Fe<sup>-</sup>)-derived carbon material.

64 **Supplementary Figure 20** | The STEM image and elemental distribution maps of *Bacillus*  
65 *pumilus*-derived carbon material obtained at 450°C.

66 **Supplementary Figure 21** | The STEM image and elemental distribution maps of *Bacillus*  
67 *pumilus*-derived carbon material obtained at 500°C.

68 **Supplementary Figure 22** | The STEM image and elemental distribution maps of *Bacillus*  
69 *pumilus*-derived carbon material obtained at 700°C.

70 **Supplementary Figure 23** | The STEM image and elemental distribution maps of *Bacillus*  
71 *pumilus*-derived carbon material obtained at 900°C.

72 **Supplementary Figure 24** | The specific surface and pore distribution of *Bacillus pumilus*-  
73 *derived carbon materials* obtained at different temperatures.

74 **Supplementary Figure 25** | XPS spectra of *Bacillus pumilus*-derived carbon materials  
75 obtained at different temperatures.

76 **Supplementary Figure 26** | Fraction analysis from XPS spectra in *Bacillus pumilus*-derived  
77 carbon materials obtained at different temperatures.

78 **Supplementary Figure 27** | XRD patterns of *Bacillus pumilus*-derived carbon materials  
79 obtained at different temperatures.

80 **Supplementary Figure 28** | Fe K-edge EXAFS (point) and the curve fit (line) for FeN<sub>5-x</sub>O<sub>x</sub>  
81 and FeN<sub>4</sub> catalysts, shown in k<sup>3</sup>-weighted *k*-space after Fourier transform (Fourier transform  
82 magnitude component).

83 **Supplementary Figure 29** | Fe K-edge EXAFS (point) and the curve fit (line) for FeN<sub>5-x</sub>O<sub>x</sub>  
84 and FeN<sub>4</sub> catalysts, shown in k<sup>3</sup>-weighted *k*-space after Fourier transform (Fourier transform  
85 imaginary component).

86 **Supplementary Figure 30** | Wavelet transform for the k<sup>2</sup>-weighted Fe K-edge EXAFS signals  
87 of FeN<sub>5-x</sub>O<sub>x</sub> and FeN<sub>4</sub> catalysts.

88 **Supplementary Figure 31** | Schematic of proposed FeN<sub>5-x</sub>O<sub>x</sub> and FeN<sub>4</sub> sites.

89 **Supplementary Figure 32** | ORR intrinsic activity of FeN<sub>5-x</sub>O<sub>x</sub> catalysts.

90 **Supplementary Figure 33** | ORR performance of FeN<sub>5-x</sub>O<sub>x</sub> catalysts in neutral electrolyte.

---

91 **Supplementary Figure 34** | Peroxide reduction reaction for FeN<sub>5-x</sub>O<sub>x</sub> catalysts.  
92 **Supplementary Figure 35** | ORR performance of FeN<sub>5-x</sub>O<sub>x</sub> catalysts.  
93 **Supplementary Figure 36** | Electrochemical cell configurations for ORR testing.  
94 **Supplementary Figure 37** | Polarization curve of FeN<sub>3</sub>O<sub>2</sub> catalyst on the gas-diffusion  
95 electrode in 1 M KOH.  
96 **Supplementary Figure 38** | Colorimetric method quantified H<sub>2</sub>O<sub>2</sub> concentration.  
97 **Supplementary Figure 39** | The ORR currents catalyzed by FeN<sub>5-x</sub>O<sub>x</sub> catalysts after potassium  
98 thiocyanate poisoning.  
99 **Supplementary Figure 40** | Computed activity volcano plots of different reactive sites in  
100 FeN<sub>3</sub>O<sub>2</sub> motif catalyzing the 2e<sup>-</sup> ORR.  
101 **Supplementary Figure 41** | The local structure of FeN<sub>3</sub>O<sub>2</sub>.  
102 **Supplementary Figure 42** | The local structure of FeN<sub>4</sub>O.  
103 **Supplementary Figure 43** | The local structure of FeN<sub>4</sub>  
104 **Supplementary Figure 44** | The local structure of O/C.  
105 **Supplementary Figure 45** | The differential charge densities of **a**, FeN<sub>3</sub>O<sub>2</sub>, **b**, FeN<sub>4</sub>O, **c**, FeN<sub>4</sub>  
106 and **d**, O/C motif.  
107 **Supplementary Figure 46** | The differential charge densities of **a**, FeN<sub>3</sub>O<sub>2</sub>, **b**, FeN<sub>4</sub>O, **c**, FeN<sub>4</sub>  
108 and **d**, O/C motif after \*OOH adsorption.  
109  
110 **Supplementary Table 1** | Microbial information and cultivated condition.  
111 **Supplementary Table 2** | Estimates of evolutionary divergence between Sequences.  
112 **Supplementary Table 3** | The BET surface area and pore distribution of *Bacillus pumilus*-  
113 *derived carbon materials* obtained at different temperatures.  
114 **Supplementary Table 4** | The fitting parameters for Fe K-edge EXAFS of *Bacillus pumilus*-  
115 *derived carbon materials* obtained at different temperatures using FeN<sub>3</sub>O<sub>2</sub> model.  
116 **Supplementary Table 5** | Free energy for O<sub>2</sub>, H<sub>2</sub>O and H<sub>2</sub>.

117  
118

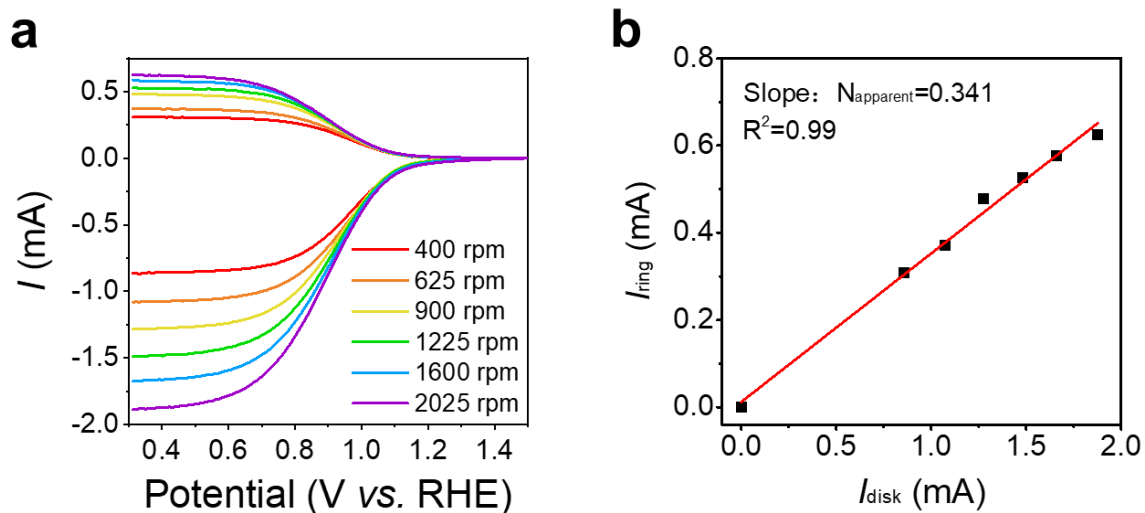

119  
 120  
 121  
 122  
 123  
 124  
 125  
 126

**Supplementary Figure 1 | RRDE collection efficiency calibration.** **a**, LSV curves of bare rotating ring-disk electrode at different rotation speed. LSV tested in 0.1 M KOH supporting electrolyte containing 10 mM  $\text{K}_3\text{Fe}(\text{CN})_6$ , scan rate:  $10 \text{ mV s}^{-1}$ , and the potential of ring electrode: 1.55 V vs. RHE. **b**, Linear fitting of the diffusion limited current densities collected by ring and disk electrodes. The experimental determined apparent collection efficiency ( $N$ ) is 34.1% at rotation speed from 400–2025 rpm, and the theoretical vale of 37.0%.

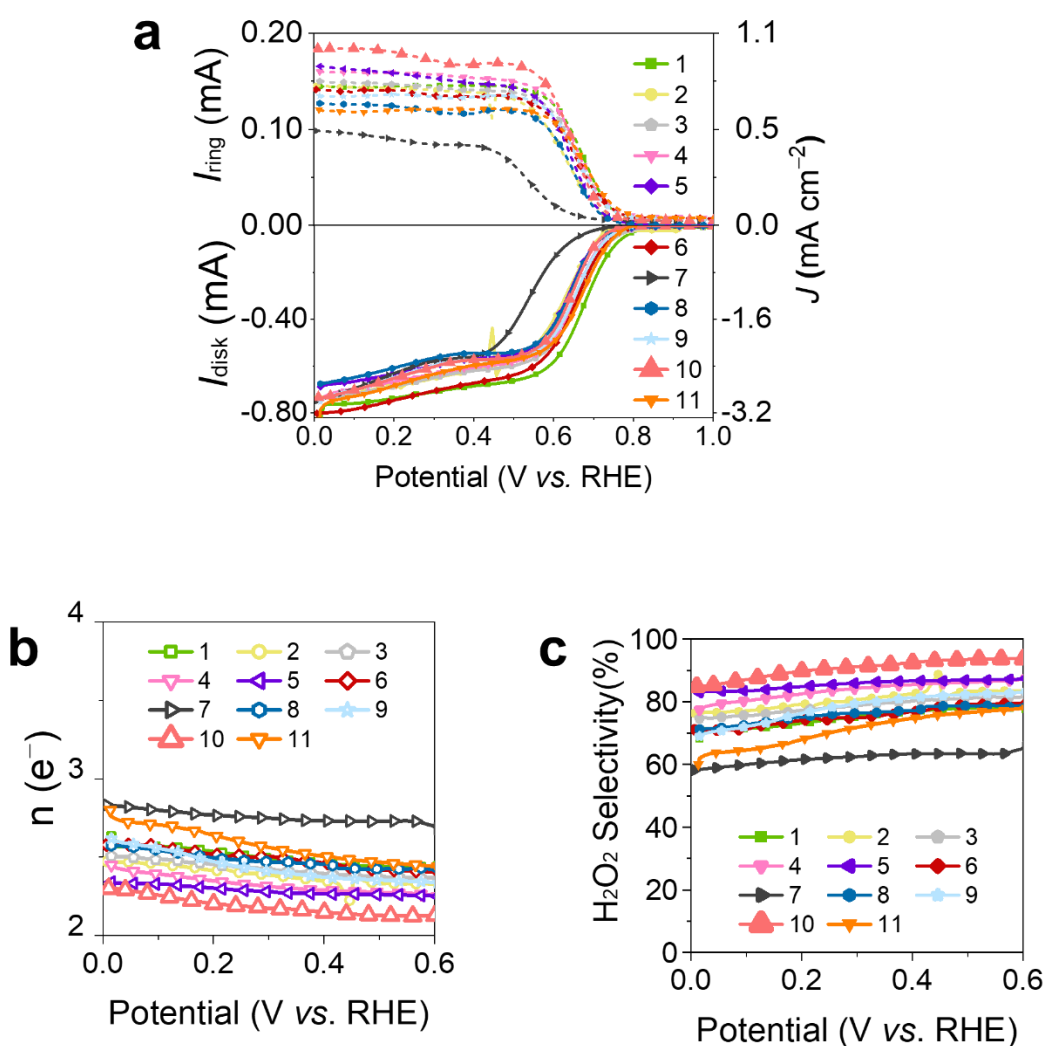

127

128 **Supplementary Figure 2 | ORR electrochemical performances of various microbe-derived**  
 129 **carbon materials. a**, polarization curves for ORR. **b**, Calculated  $\text{H}_2\text{O}_2$  selectivity. **c**, electron  
 130 transfer number at 0–0.6 V vs. RHE. ORR polarization curve measured by a rotating ring-disk  
 131 electrode at 1600 rpm in  $\text{O}_2$ -saturated 0.1 M KOH. The absolute mass loading of catalyst on  
 132 electrode was  $0.1 \text{ mg cm}^{-2}$ . Numbers 1–11 represent *Escherichia coli*, *Shewanella oneidensis*,  
 133 *Halomonas titanicae*, *Pseudomonas aeruginosa*, *Cupriavidus necator*, *Eubacterium limosum*,  
 134 *Lactobacillus acidophilus*, *Bacillus thuringiensis*, *Bacillus subtilis*, *Bacillus pumilus* and  
 135 *Saccharomyces cerevisiae*, respectively.

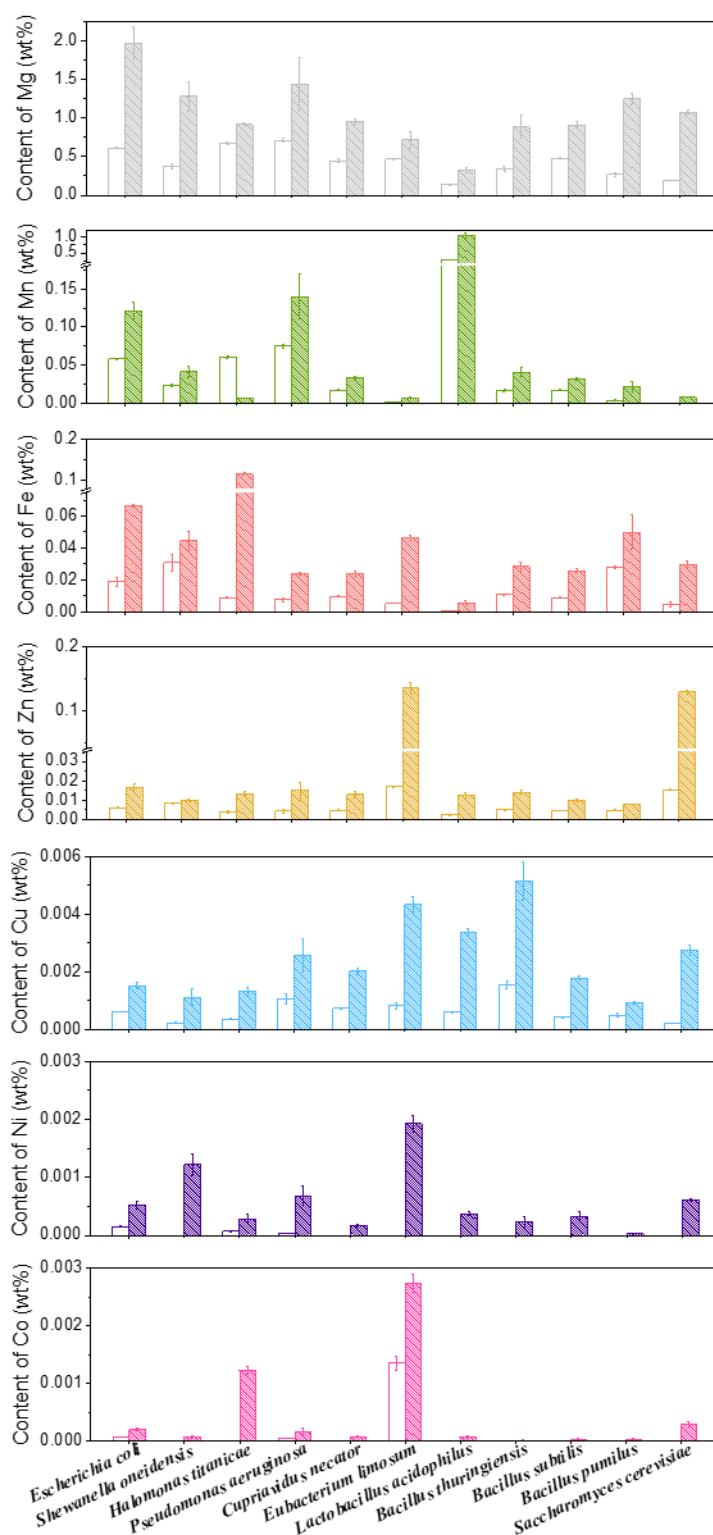

136

137 **Supplementary Figure 3 | The content of the predominant metal elements in**  
 138 **microorganisms (hollow) and the corresponding derived carbon materials (solid fill**  
 139 **pattern) measured by ICP-MS. a, Mg, b, Mn, c, Fe, d, Zn, e, Cu, f) Ni, and g, Co. Error bars**  
 140 **represent the standard deviation for three separate measurements.**

141

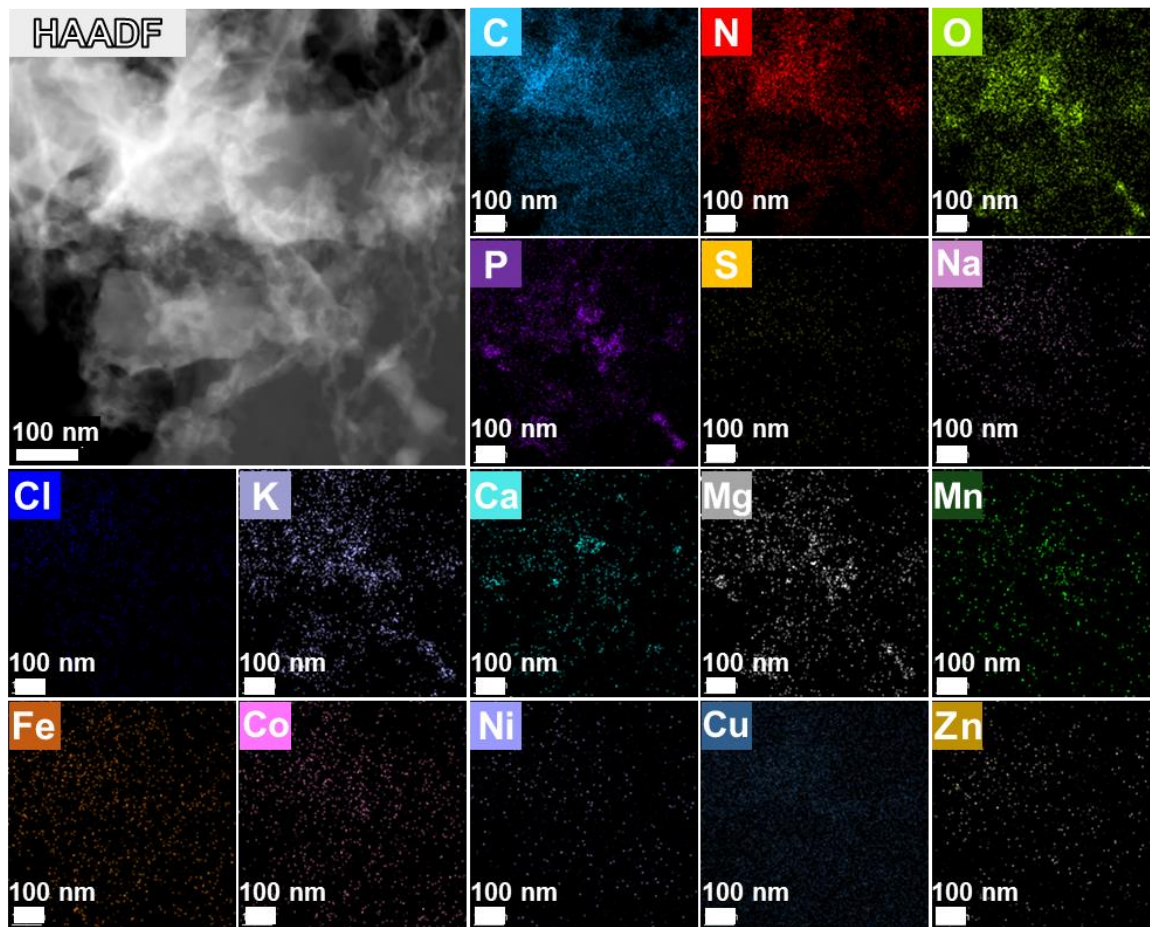

142  
 143  
 144

Supplementary Figure 4 | The STEM image and elemental distribution maps of *Escherichia coli*-derived carbon material.



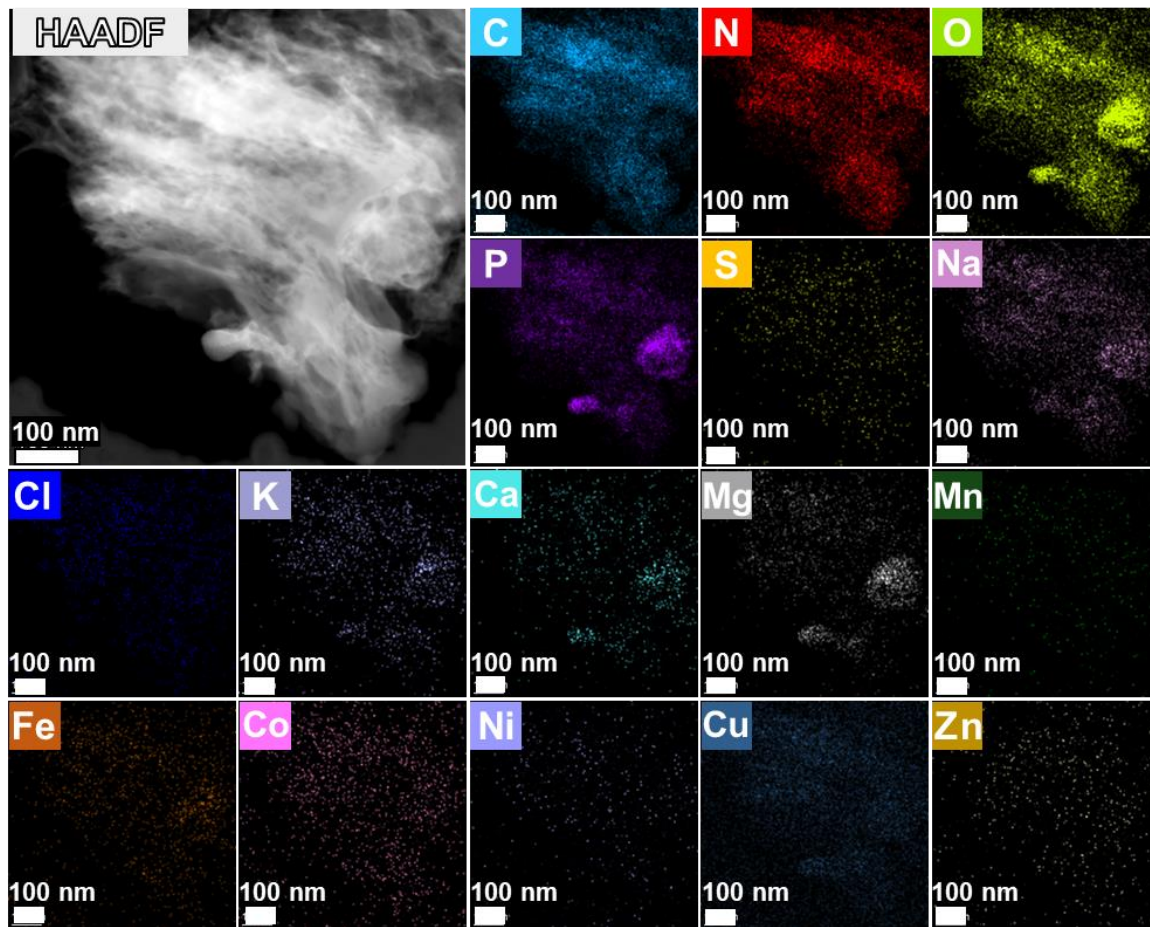

145  
 146  
 147  
 148

Supplementary Figure 5 | The STEM image and elemental distribution maps of *Shewanella oneidensis*-derived carbon material.

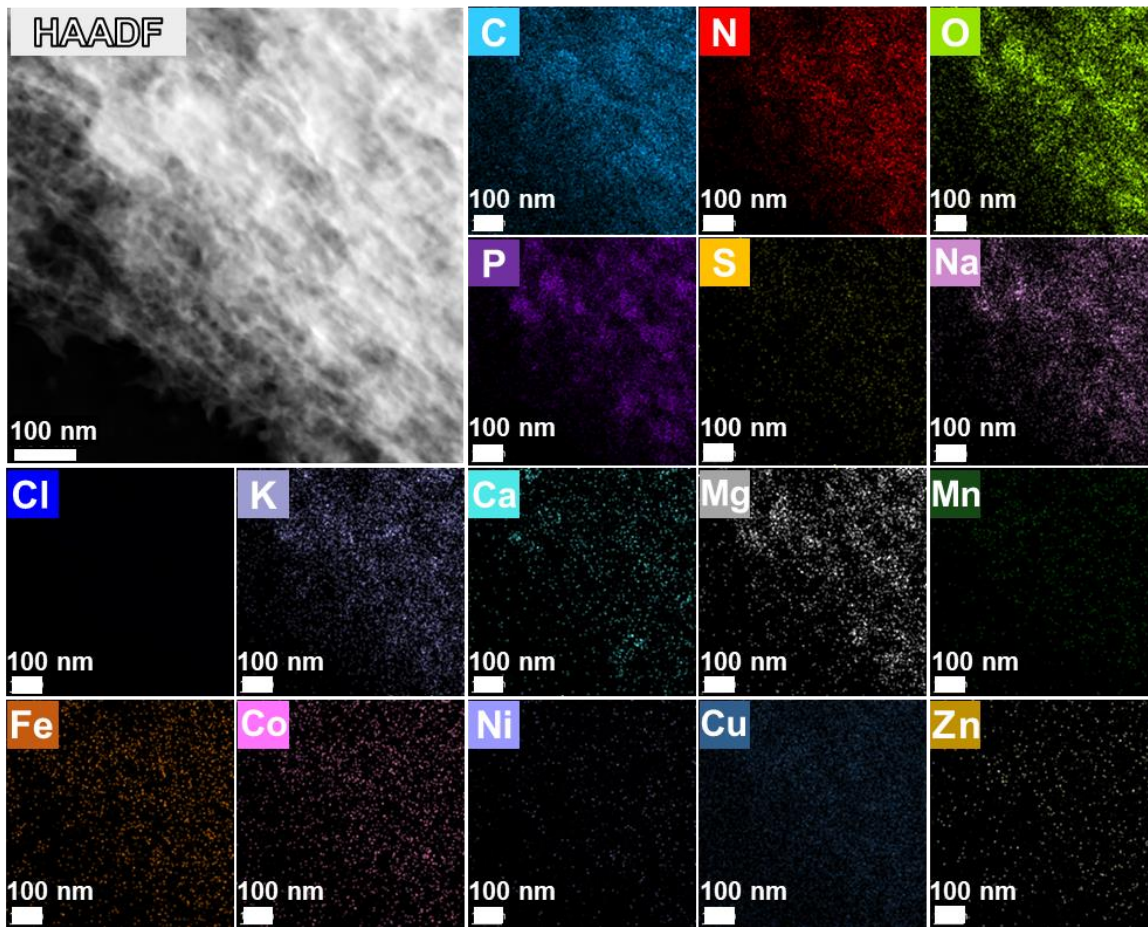

149  
 150  
 151  
 152

Supplementary Figure 6 | The STEM image and elemental distribution maps of *Halomonas titanicae*-derived carbon material.

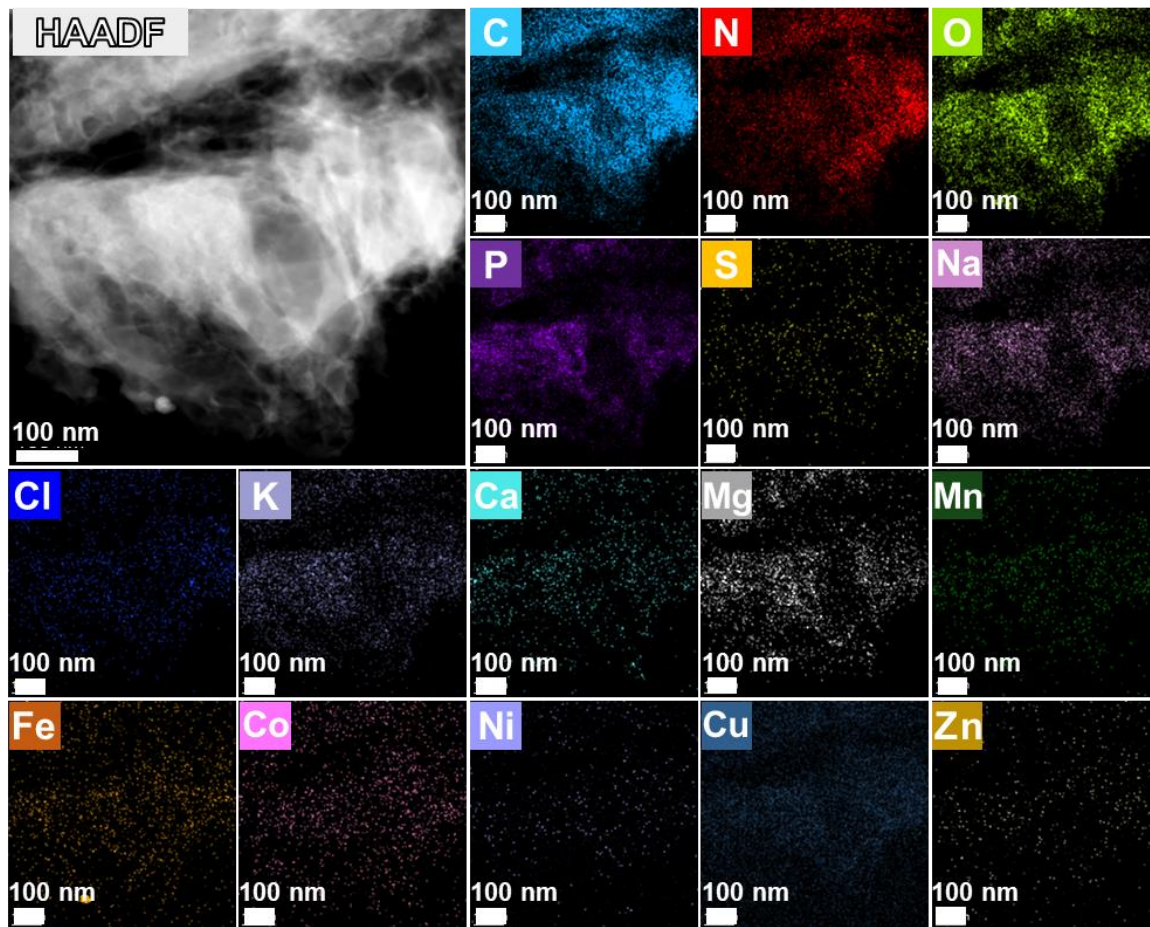

153  
 154  
 155

Supplementary Figure 7 | The STEM image and elemental distribution maps of *Pseudomonas aeruginosa*-derived carbon material.

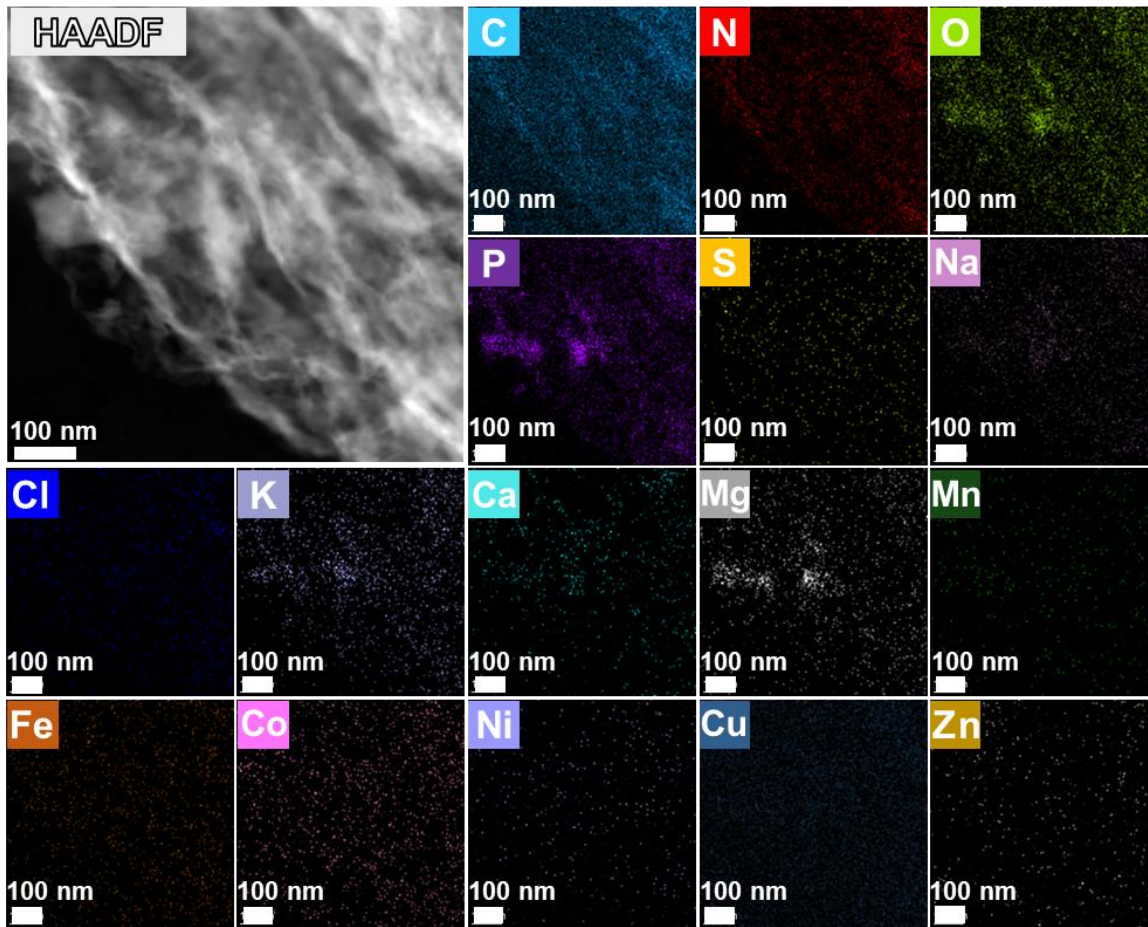

156  
 157  
 158  
 159

Supplementary Figure 8 | The STEM image and elemental distribution maps of *Cupriavidus necator*-derived carbon material.

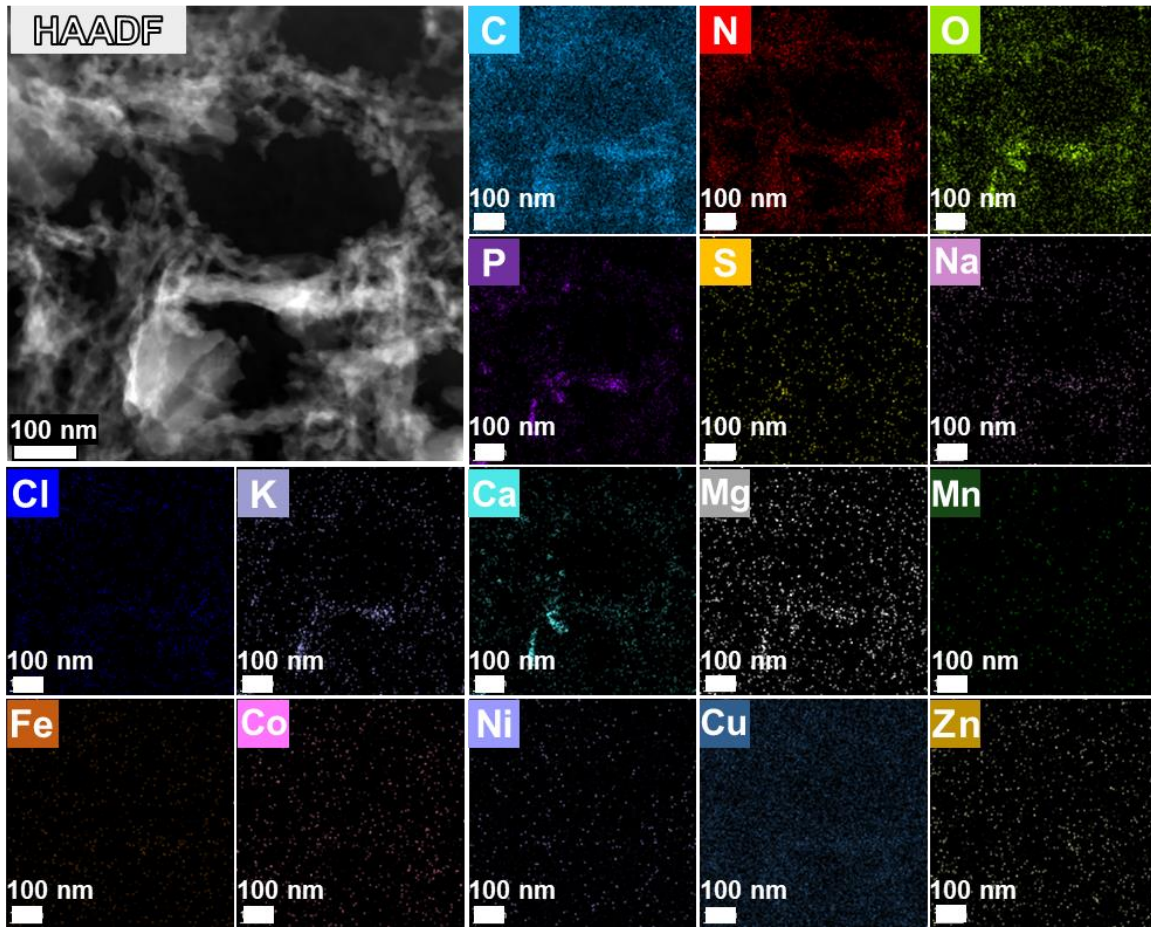

160  
 161  
 162  
 163

Supplementary Figure 9 | The STEM image and elemental distribution maps of *Eubacterium limosum*-derived carbon material.

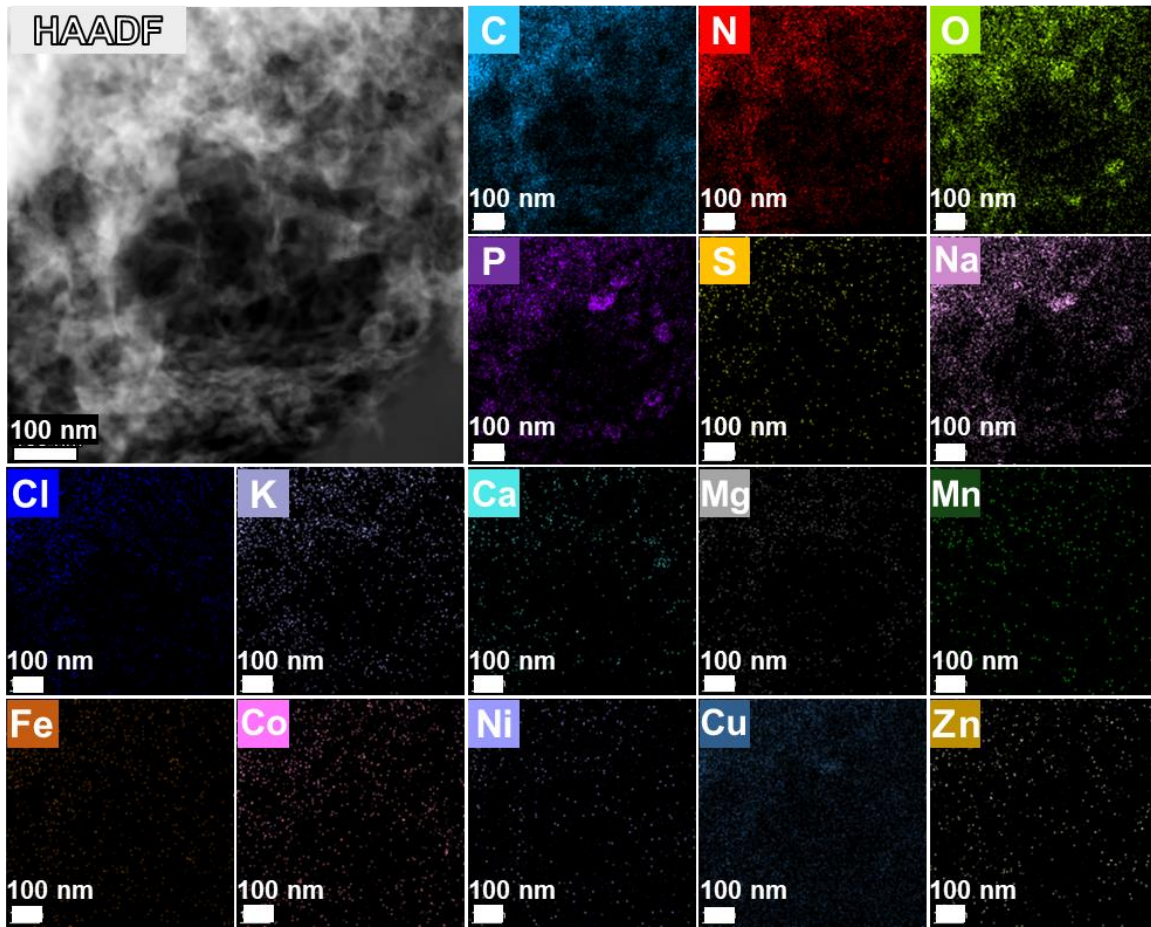

164  
 165  
 166  
 167

**Supplementary Figure 10 | The STEM image and elemental distribution maps of *Lactobacillus acidophilus*-derived carbon material.**

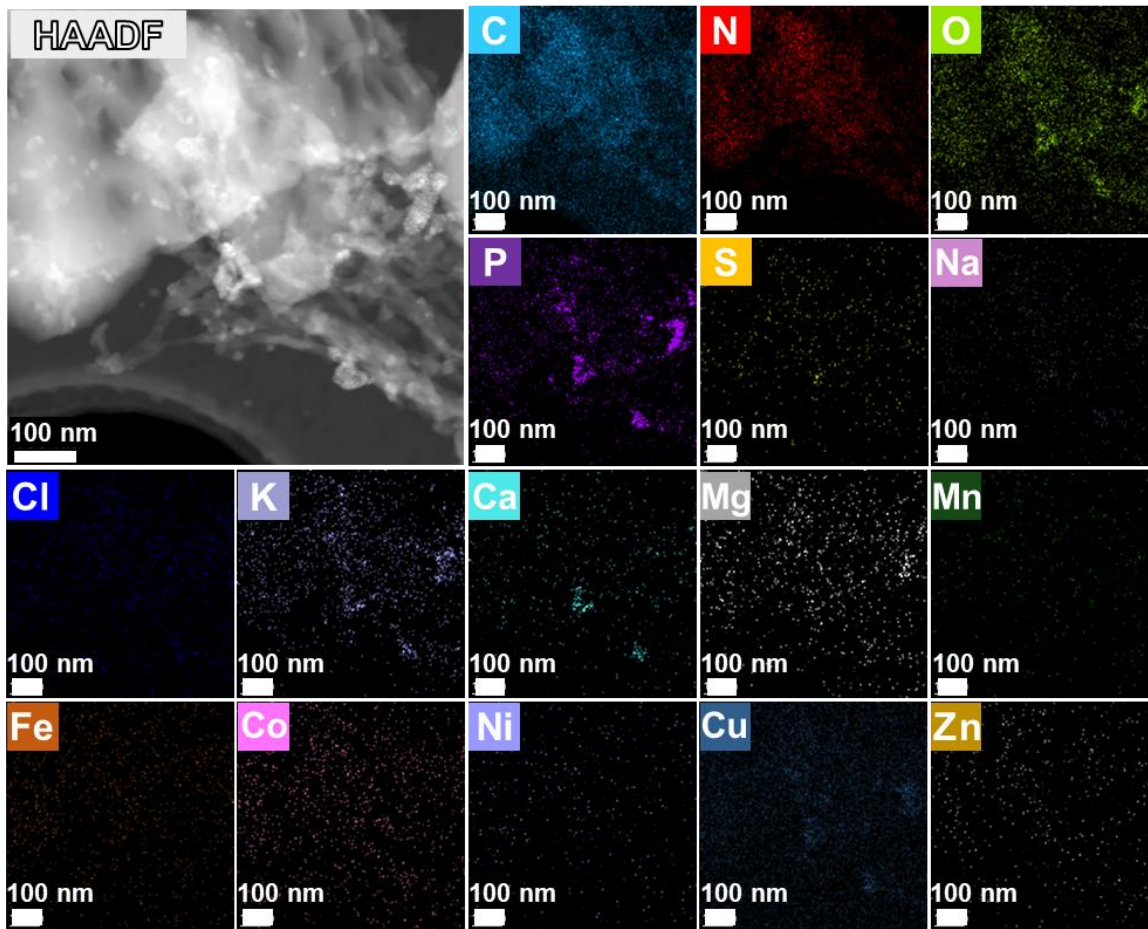

168  
 169  
 170  
 171

Supplementary Figure 11 | The STEM image and elemental distribution maps of *Bacillus thuringiensis*-derived carbon material.

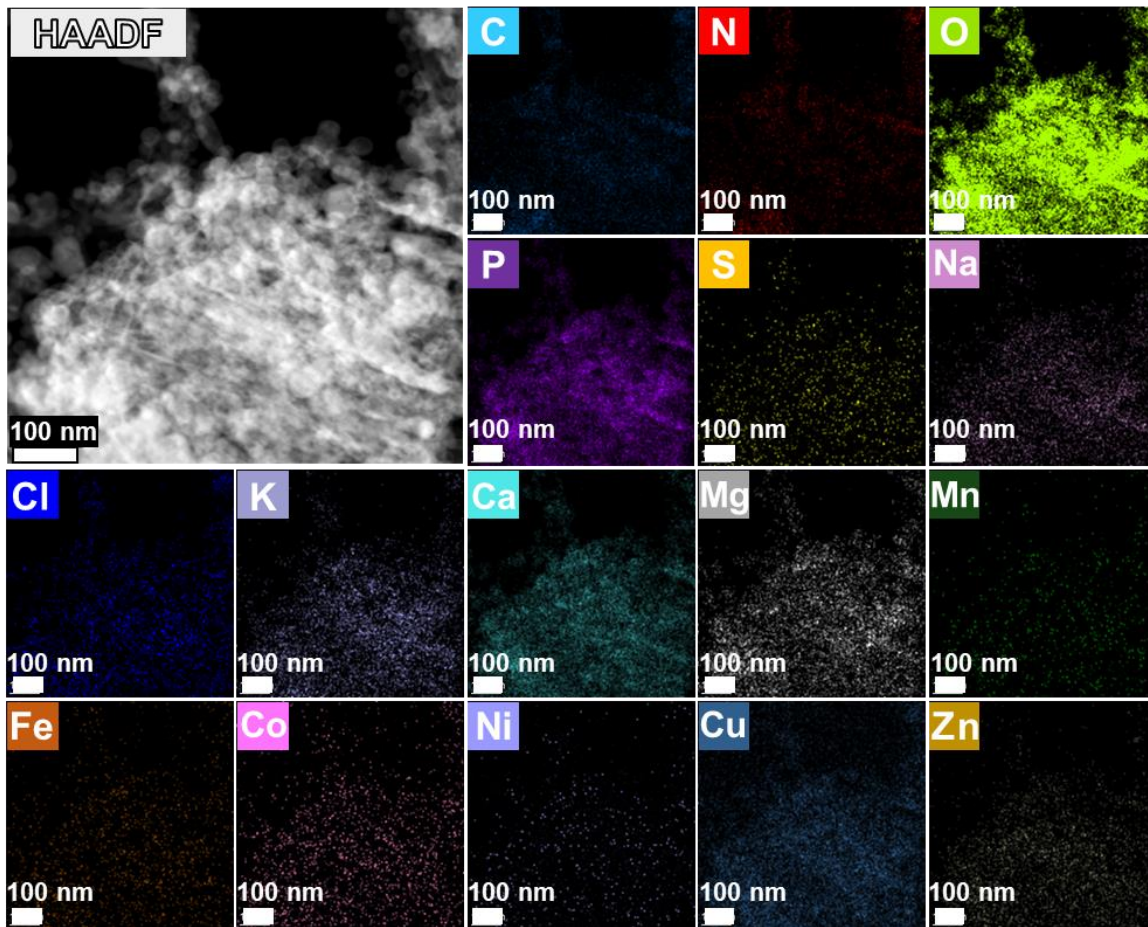

172  
 173  
 174  
 175

Supplementary Figure 12 | The STEM image and elemental distribution maps of *Bacillus subtilis*-derived carbon material.



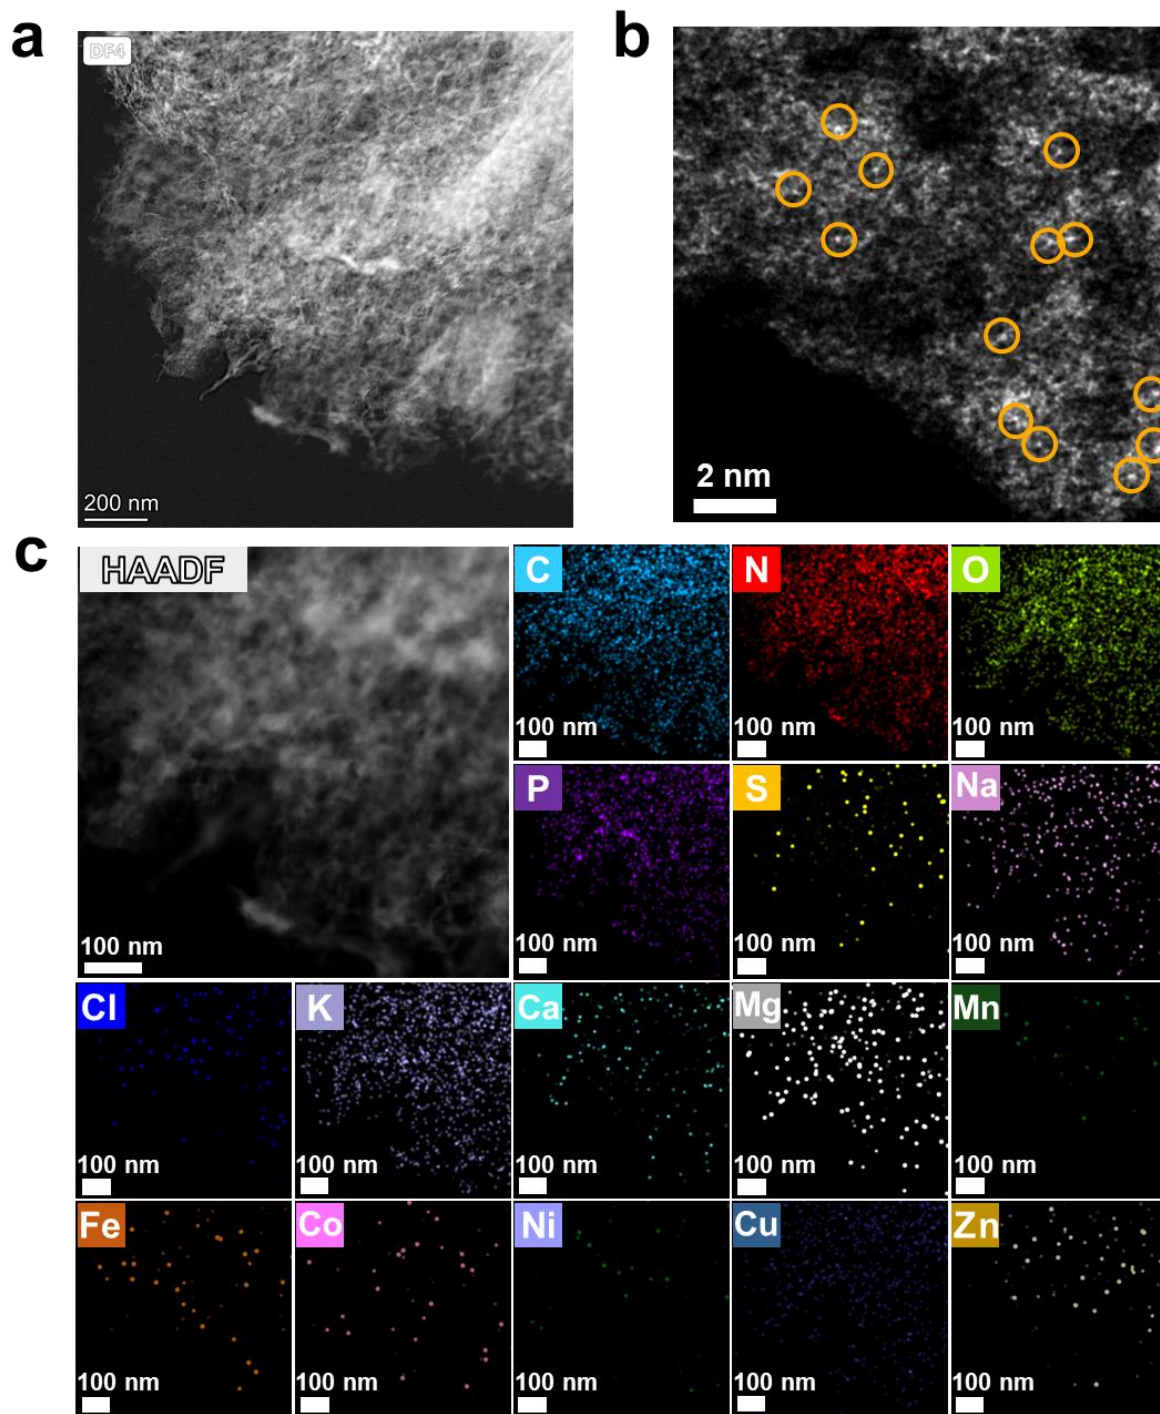

176  
 177  
 178  
 179  
 180  
 181

**Supplementary Figure 13 | The AC-STEM images and elemental distribution maps of *Bacillus pumilus*-derived carbon material. a, Dark field image, b, High resolution HAADF-STEM image and c, Elemental distribution map. Metal atoms are monodisperse as marked with yellow circles in high resolution HAADF-STEM image.**

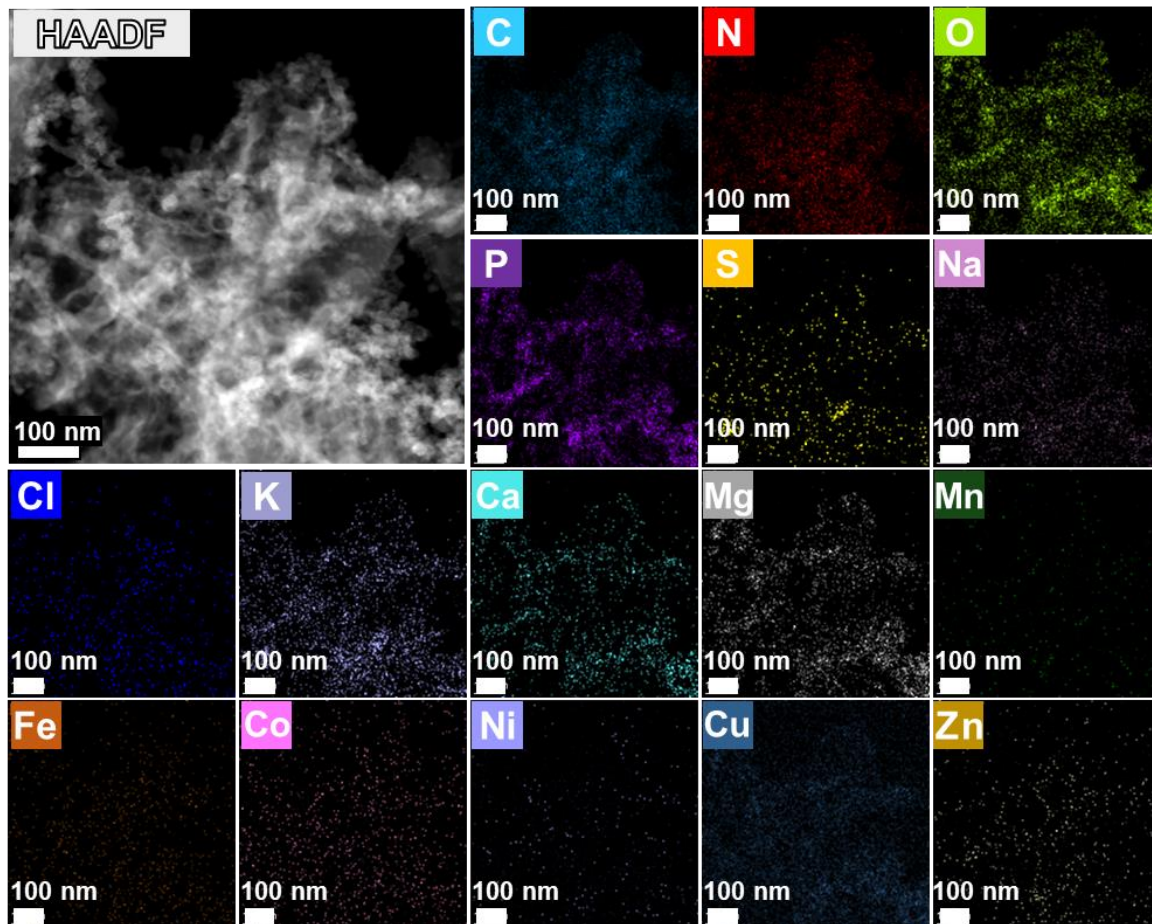

182  
 183  
 184  
 185

Supplementary Figure 14 | The STEM image and elemental distribution maps of *Saccharomyces cerevisiae*-derived carbon material.

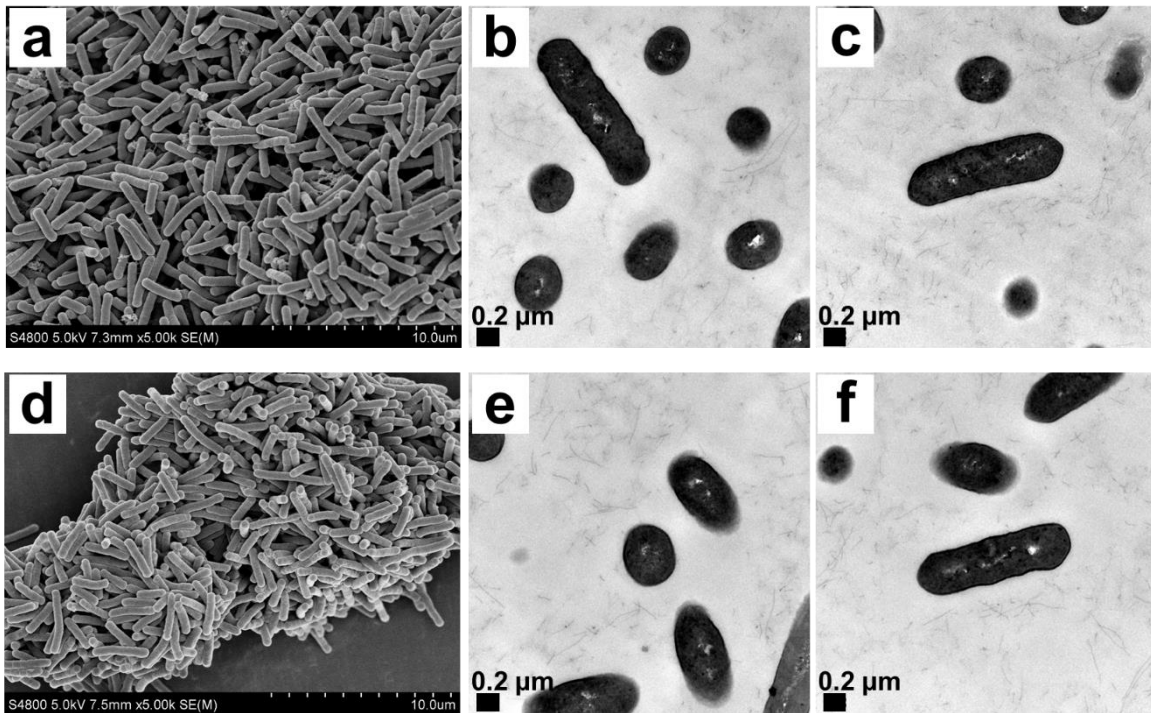

186

187 **Supplementary Figure 15 | The morphology of *Bacillus pumilus* and *Bacillus***  
 188 ***pumilus*(Fe<sup>-</sup>).** *Bacillus pumilus* is often used as an industrial fermentative bacterium, being  
 189 easy to culture with a short growth period. *Bacillus pumilus* will express a variety of iron-  
 190 containing structures, for example, Siderophores, Fe-superoxide dismutase, Heme-containing  
 191 enzymes/proteins. **a**, SEM images of vegetative *Bacillus pumilus* cells. **b-c**, TEM images of  
 192 the biology slice taken from biopsy samples of osmium acid and lead acetate pre-treated  
 193 *Bacillus pumilus*. **d**, SEM images of vegetative *Bacillus pumilus*(Fe<sup>-</sup>) cells. **e-f**, TEM images  
 194 of the biology slice taken from biopsy samples of osmium acid and lead acetate pre-treated  
 195 *Bacillus pumilus*(Fe<sup>-</sup>) cells.

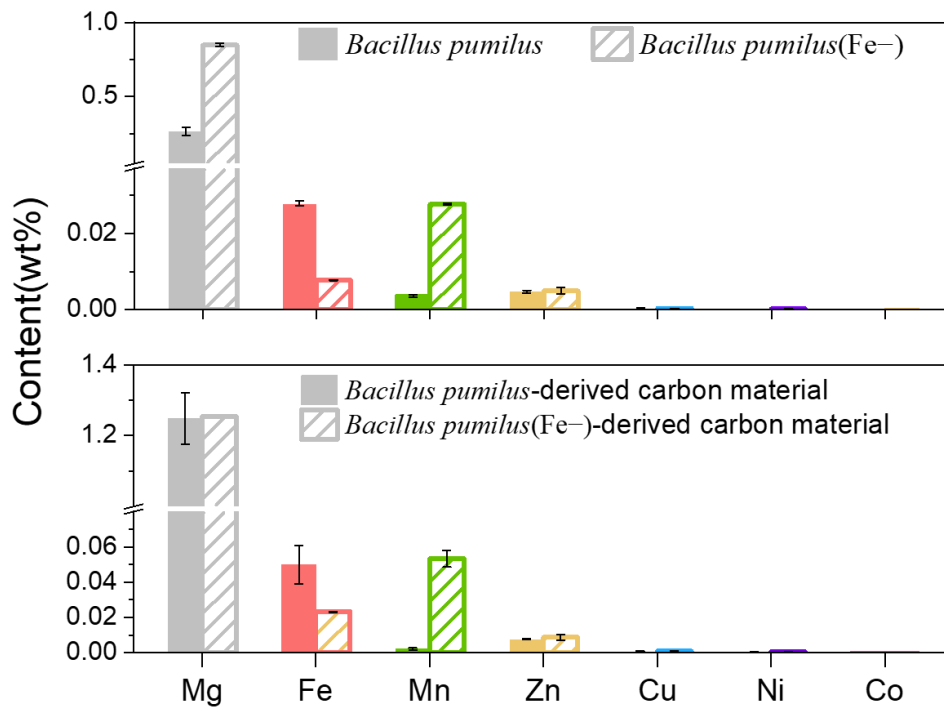

196

197 **Supplementary Figure 16 | The content of metal elements in *Bacillus pumilus*, *Bacillus***  
 198 ***pumilus*(Fe-), *Bacillus pumilus*-derived carbon material and *Bacillus pumilus*(Fe-)-**  
 199 **derived carbon material.** Error bars represent the standard deviation for three separate  
 200 measurements.

201

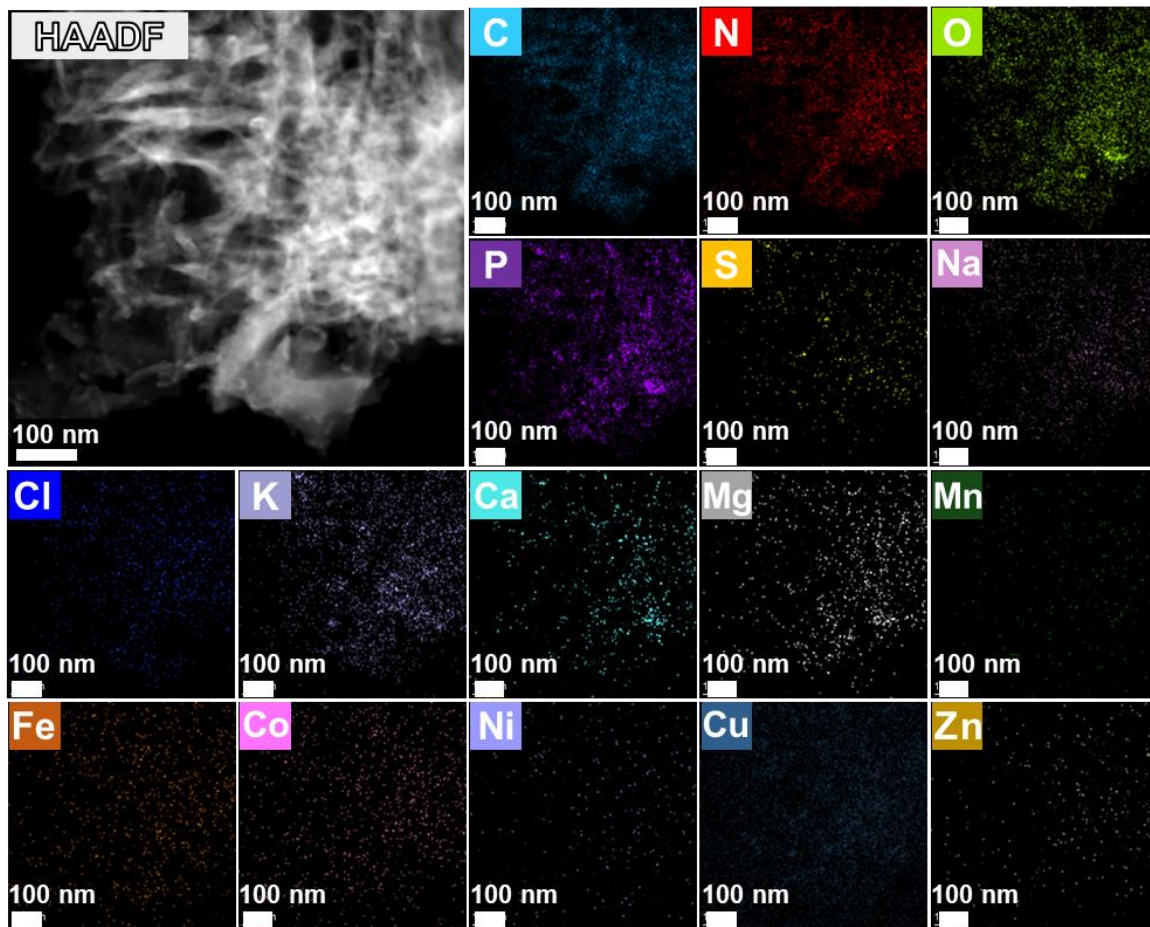

202  
 203  
 204  
 205

Supplementary Figure 17 | The STEM and elemental distribution map of *Bacillus pumilus*(Fe-)-derived carbon material.

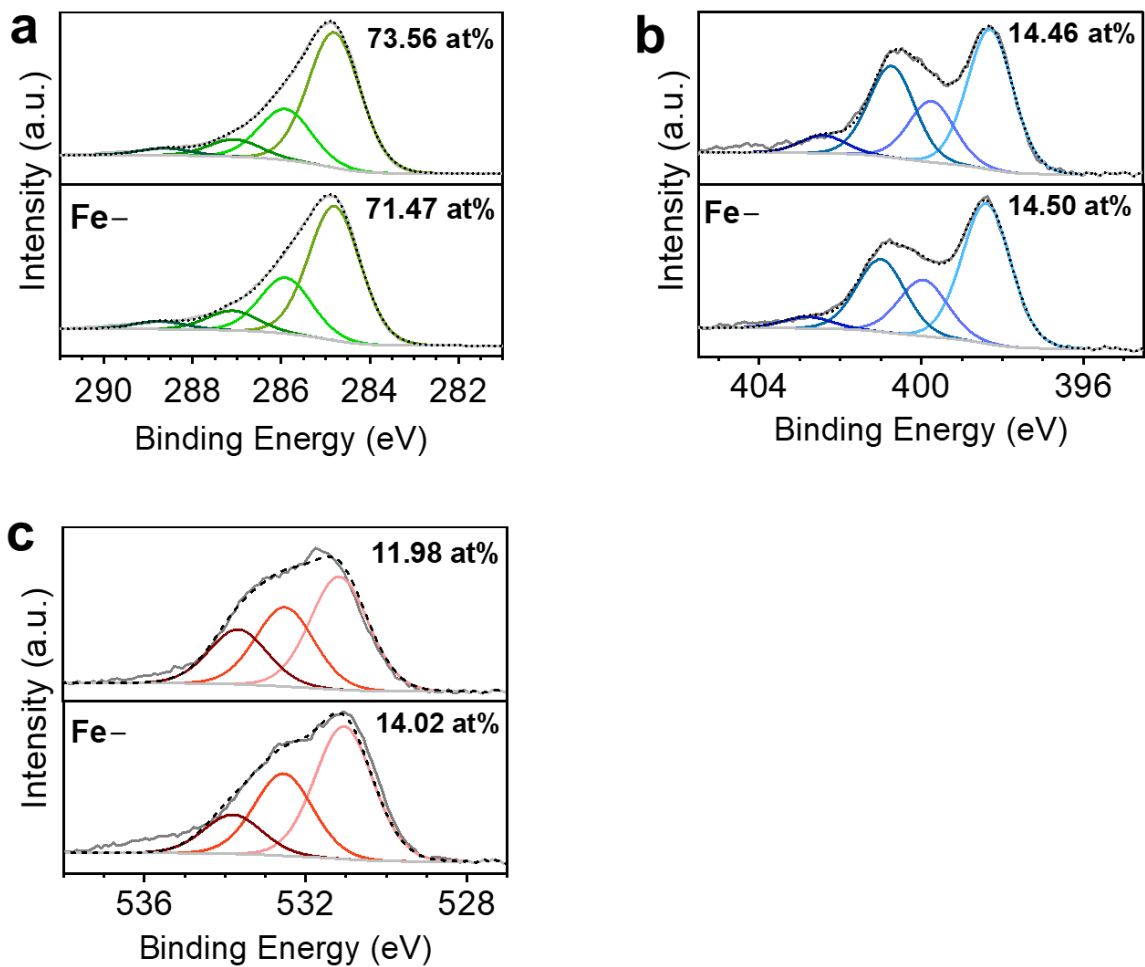

206  
 207  
 208  
 209  
 210

**Supplementary Figure 18 | XPS spectra of *Bacillus pumilus*-derived carbon material (top) and *Bacillus pumilus*(Fe-)-derived carbon material (down). a, C 1s spectra, b, N 1s spectra, and c, O 1s spectra.**

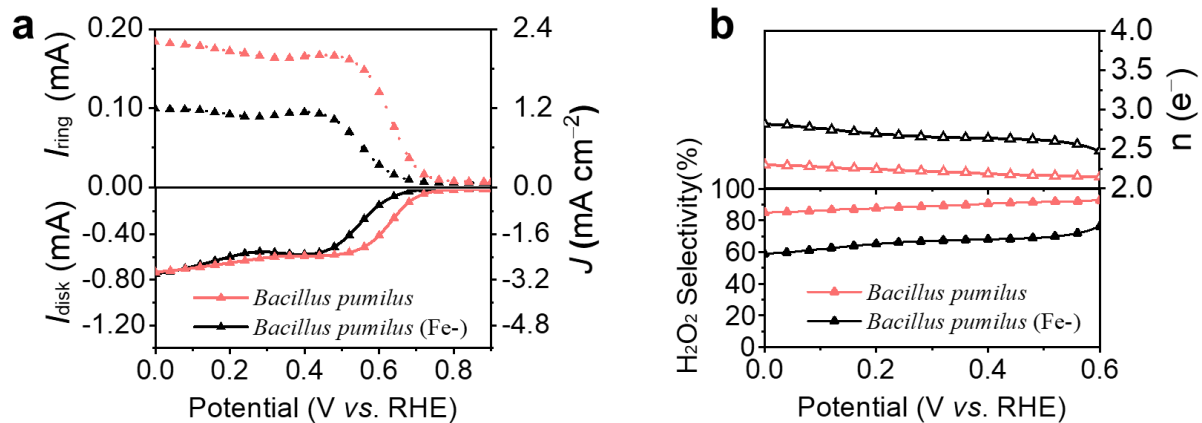

211

212 **Supplementary Figure 19 | ORR electrochemical performance of *Bacillus pumilus*-**  
 213 **derived carbon material and *Bacillus pumilus*(Fe-)-derived carbon material. a, ORR**  
 214 **polarization curve. b, Calculated ORR electron transfer number and  $\text{H}_2\text{O}_2$  selectivity.**

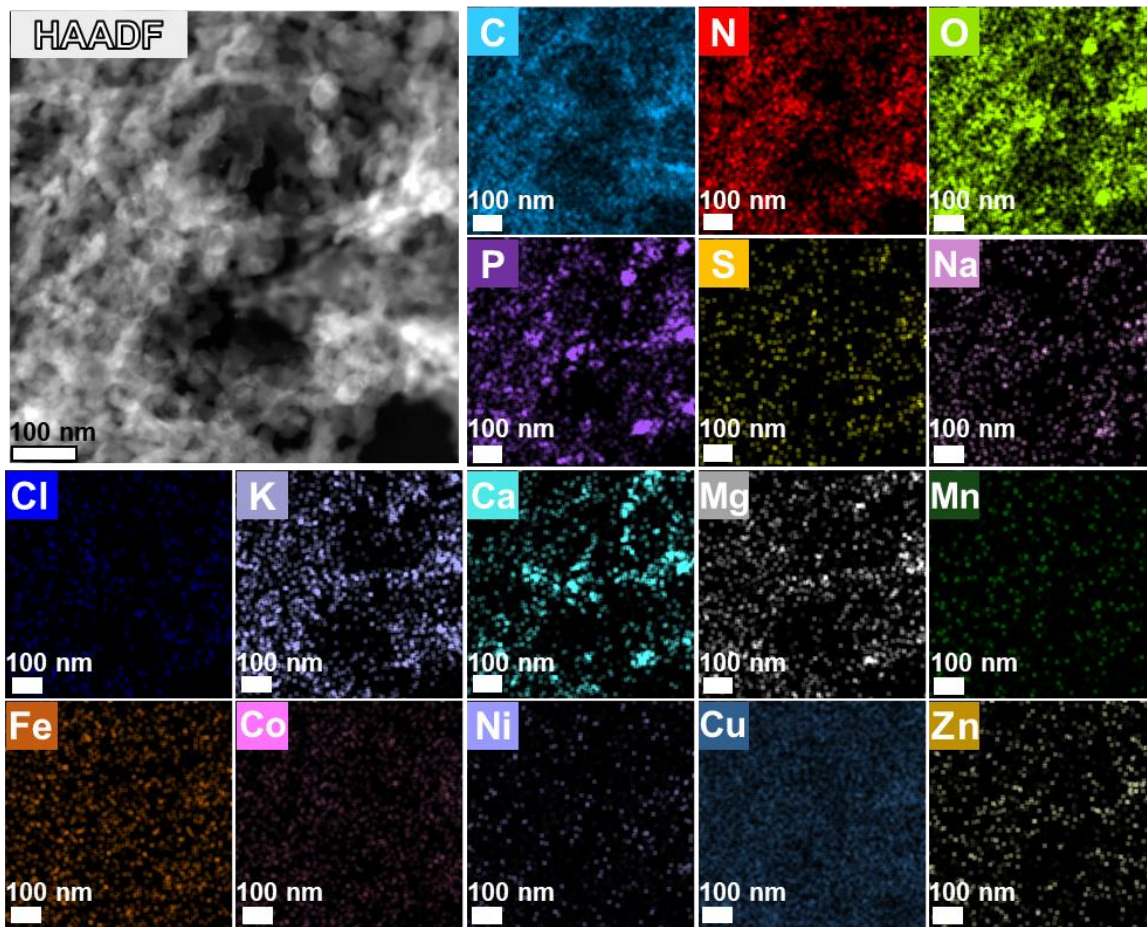

215  
 216  
 217  
 218

**Supplementary Figure 20 | The STEM image and elemental distribution maps of *Bacillus pumilus*-derived carbon material obtained at 450°C.**



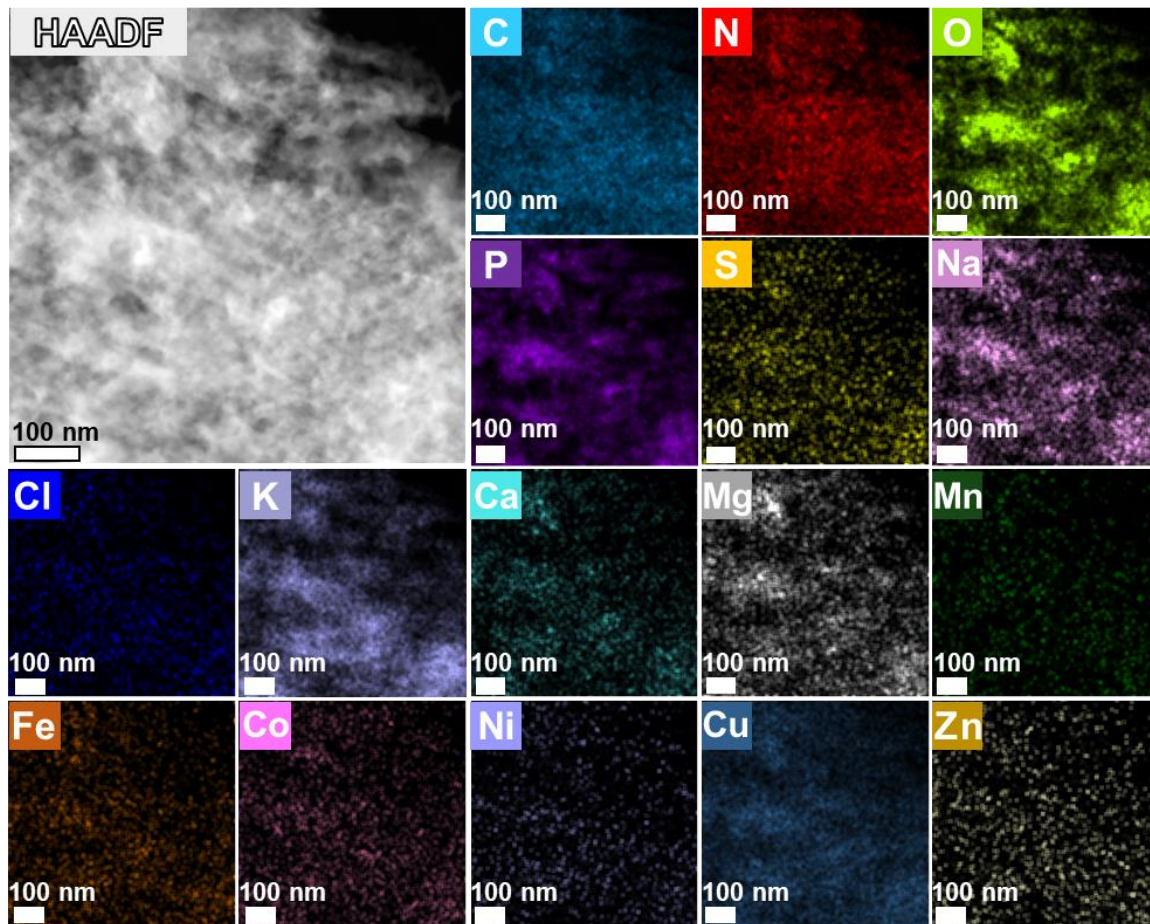

219  
 220  
 221  
 222

**Supplementary Figure 21 | The STEM image and elemental distribution maps of *Bacillus pumilus*-derived carbon material obtained at 500°C.**

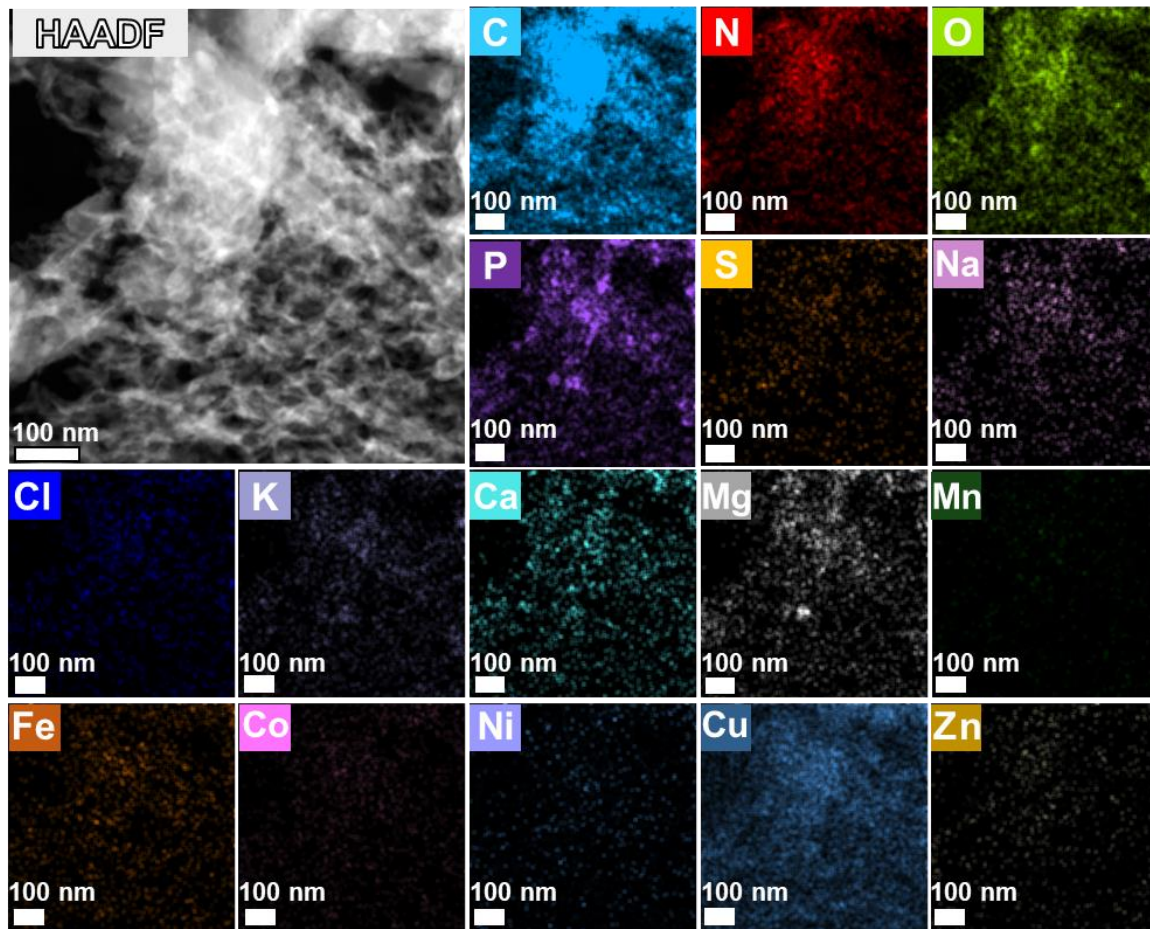

223  
 224  
 225  
 226

Supplementary Figure 22 | The STEM image and elemental distribution maps of *Bacillus pumilus*-derived carbon material obtained at 700°C.



227  
 228  
 229  
 230

**Supplementary Figure 23 | The STEM image and elemental distribution maps of *Bacillus pumilus*-derived carbon material obtained at 900°C.**

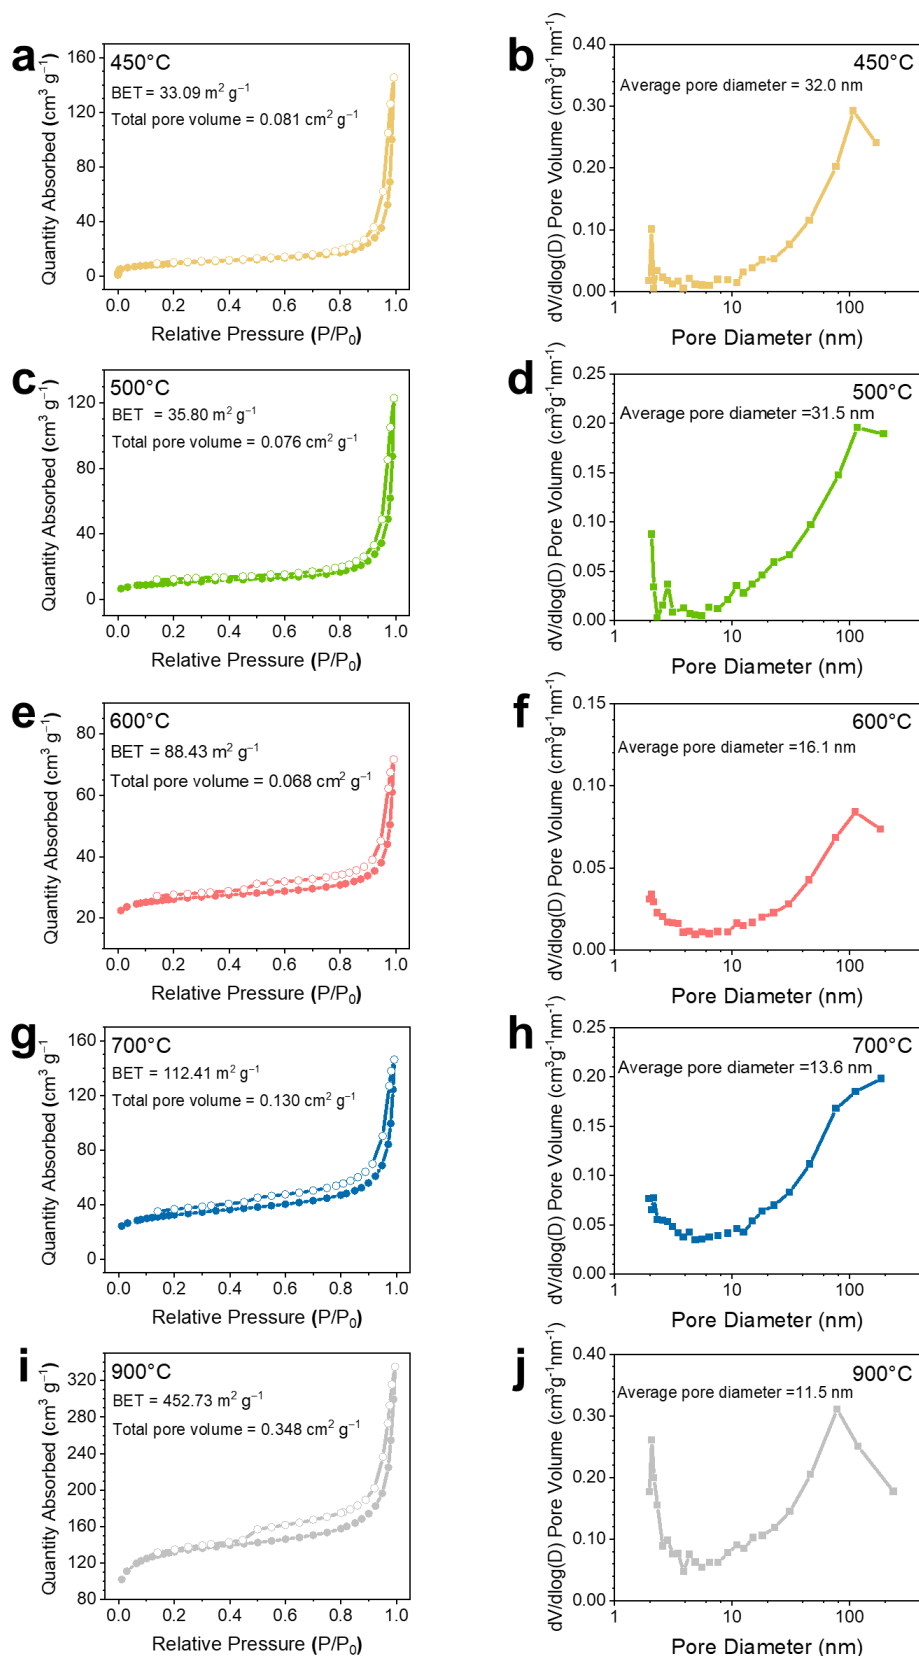

231  
 232  
 233  
 234  
 235

**Supplementary Figure 24 | The specific surface and pore distribution of *Bacillus pumilus*-derived carbon materials obtained at different temperatures. a, c, e, g, and i, Nitrogen adsorption-desorption isotherms (labeled as solid and hollow) and b, d, f, h, and j, the corresponding pore size distribution.**

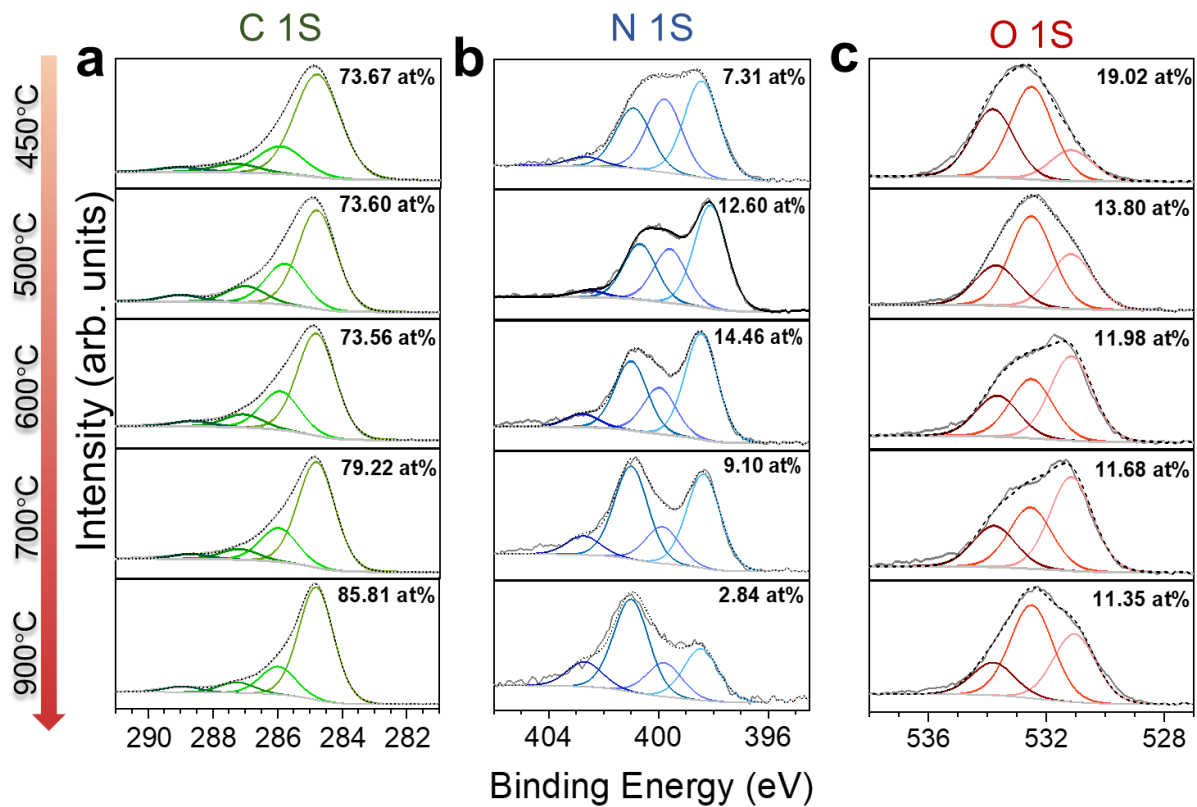

236  
 237  
 238  
 239

Supplementary Figure 25 | XPS spectra of *Bacillus pumilus*-derived carbon materials obtained at different temperatures. **a**, C 1s spectra, **b**, N 1s spectra, and **c**, O 1s spectra.

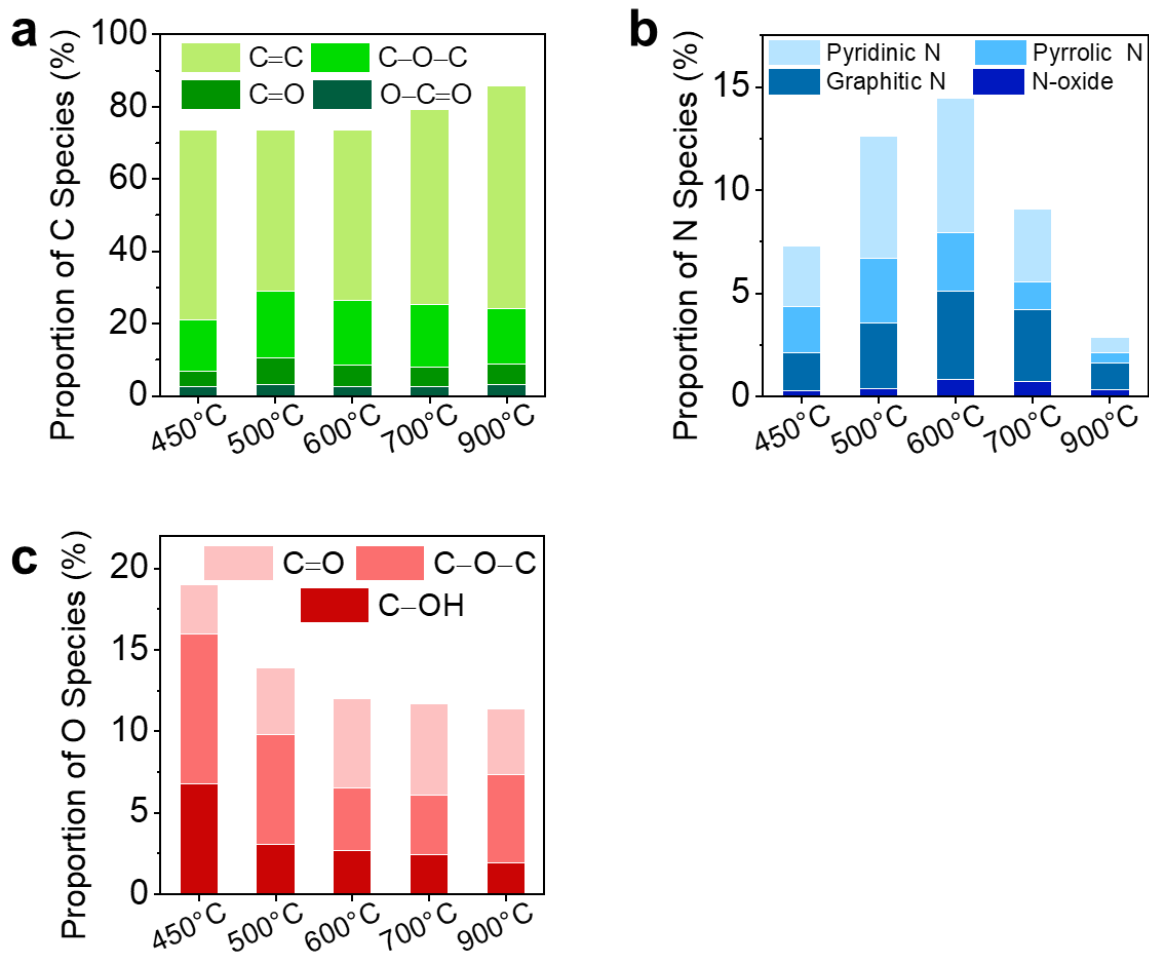

240

241

242

243

244

**Supplementary Figure 26 | Fraction analysis from XPS spectra of *Bacillus pumilus*-derived carbon materials obtained at different temperatures. a, C fraction, b, N fraction and c, O fraction.**

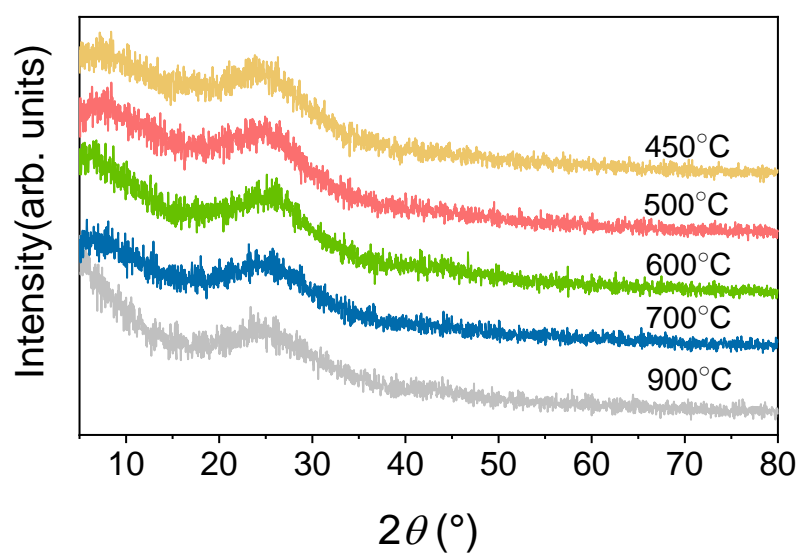

245  
246  
247  
248

**Supplementary Figure 27 | XRD patterns of *Bacillus pumilus*-derived carbon materials obtained at different temperatures.**

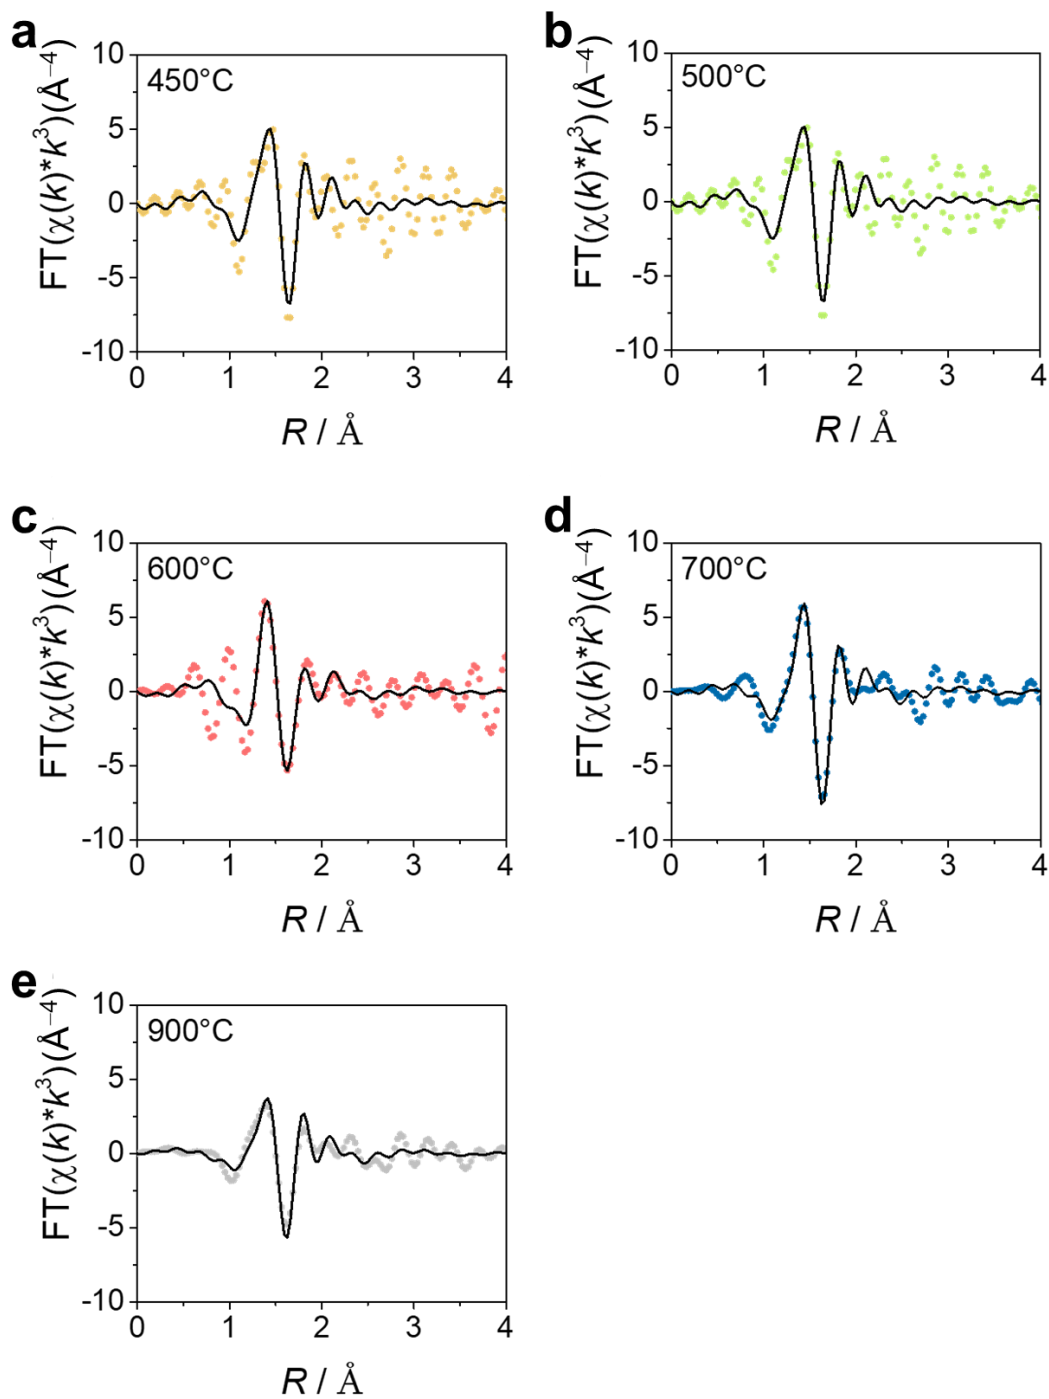

249

250 **Supplementary Figure 28 | Fe K-edge EXAFS (point) and the curve fit (line) for FeN<sub>5-x</sub>O<sub>x</sub>**  
 251 **and FeN<sub>4</sub> catalysts, shown in k<sup>3</sup>-weighted k-space after Fourier transform (Fourier**  
 252 **transform magnitude component).**

253



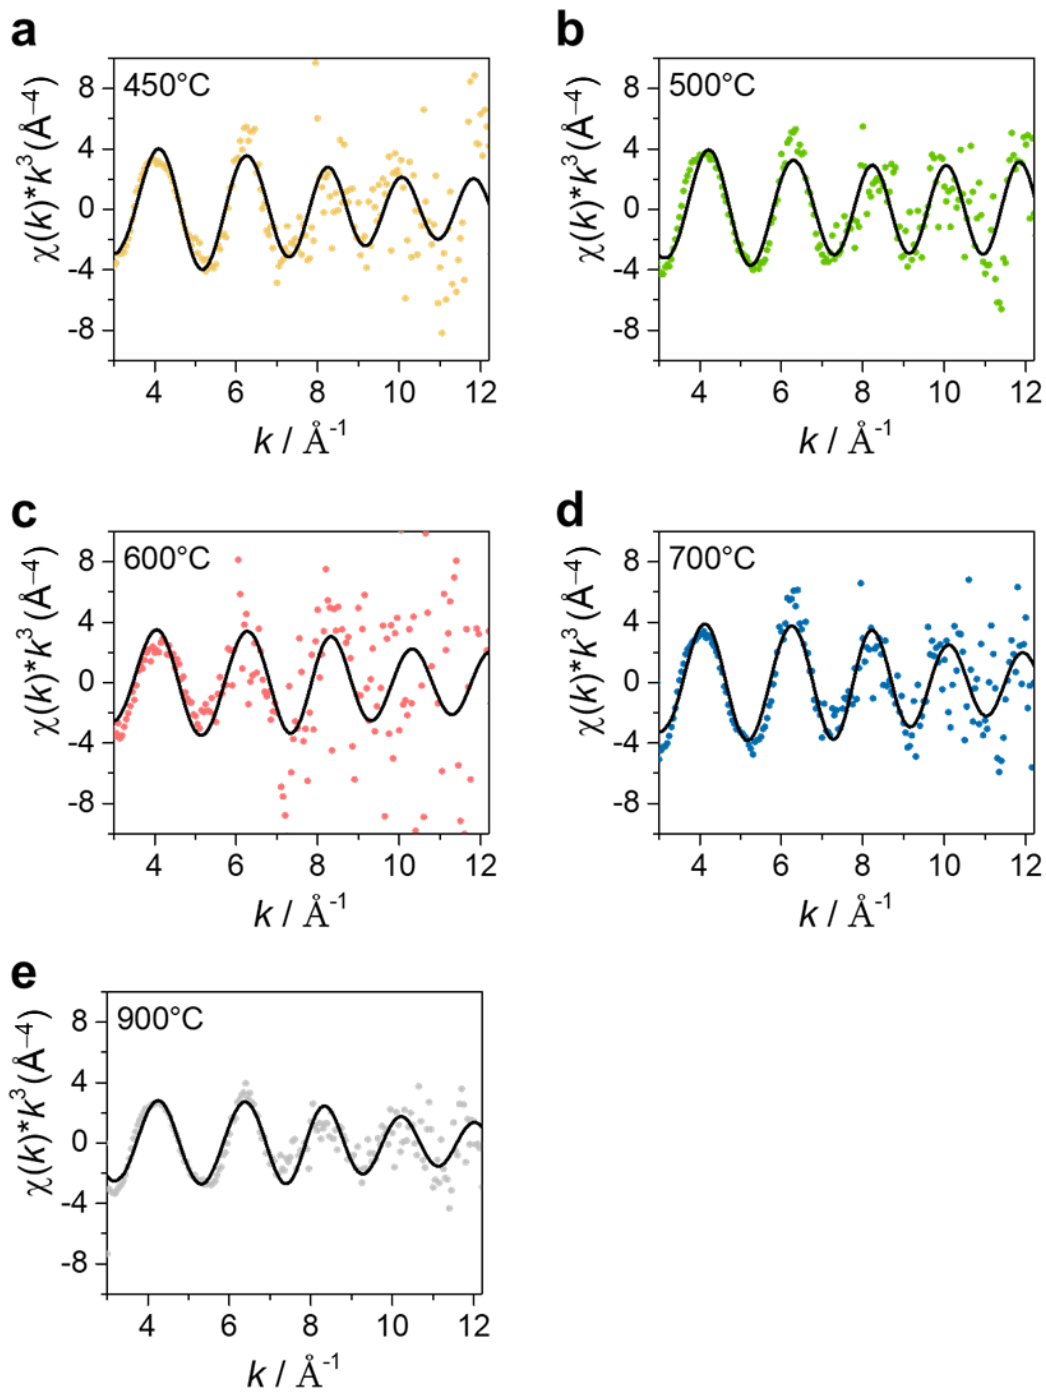

254  
 255  
 256  
 257  
 258

**Supplementary Figure 29 | Fe K-edge EXAFS (point) and the curve fit (line) for FeN<sub>5-x</sub>O<sub>x</sub> and FeN<sub>4</sub> catalysts, shown in k<sup>3</sup>-weighted k-space after Fourier transform (Fourier transform imaginary component).**

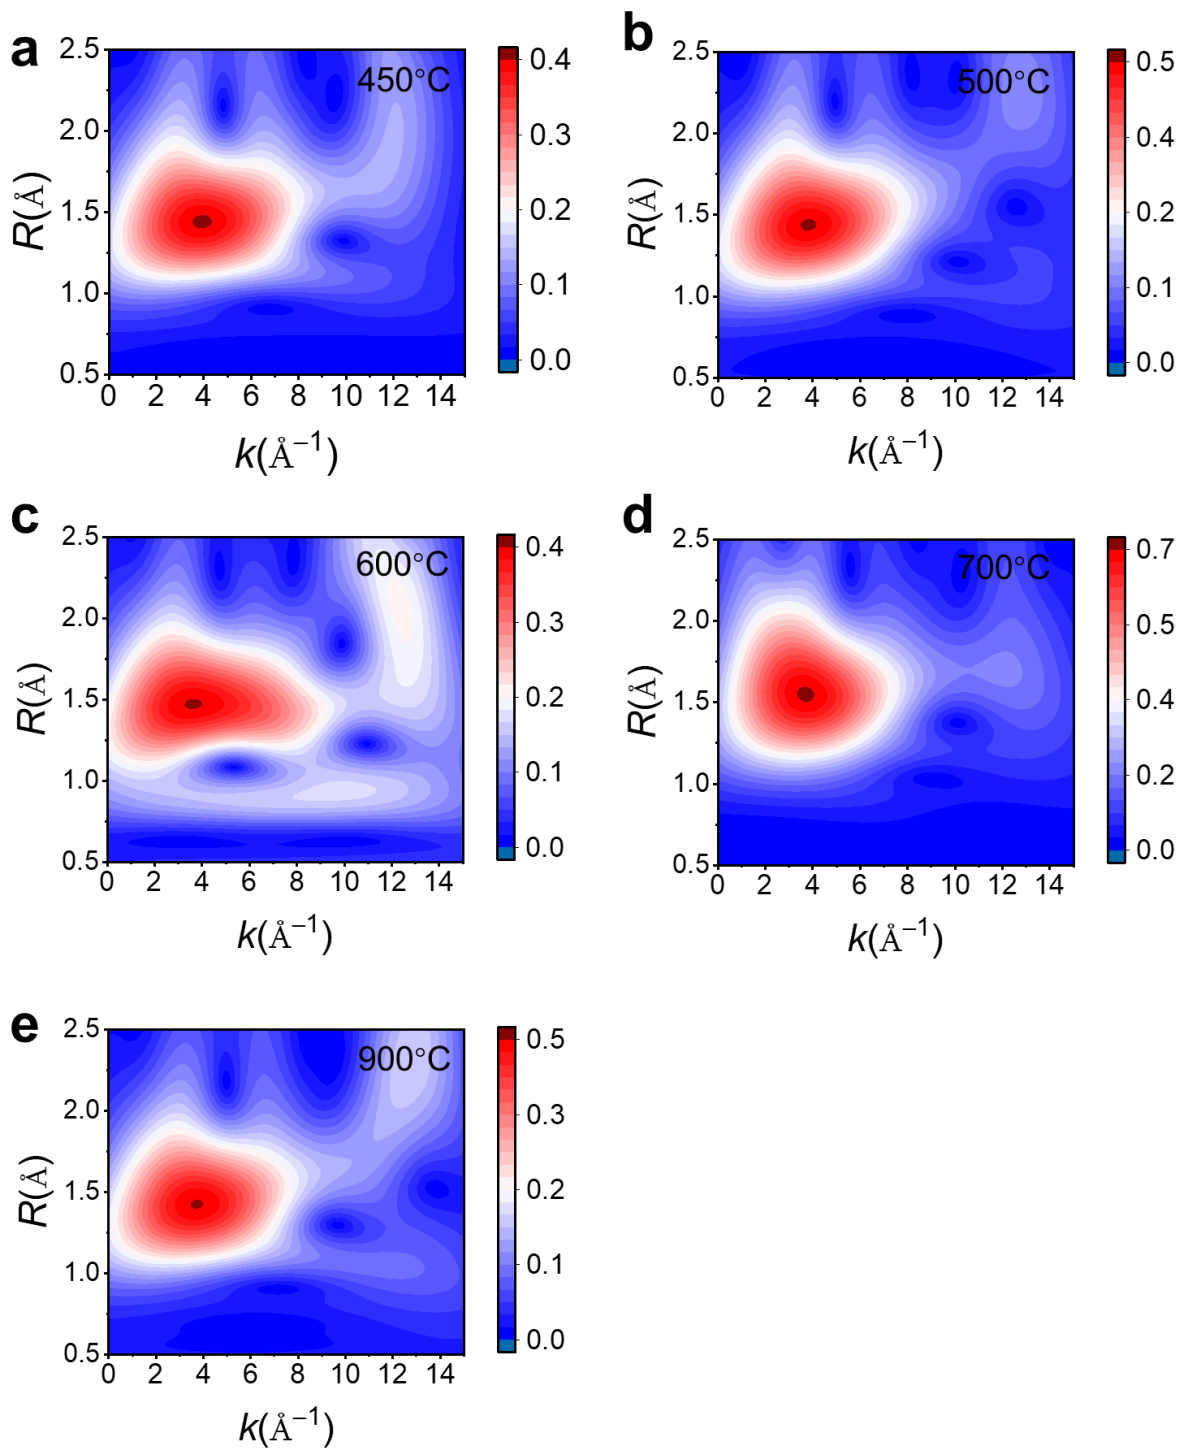

259

260

261

262

**Supplementary Figure 30 | Wavelet transform for the  $k^2$ -weighted Fe K-edge EXAFS signals of  $\text{FeN}_{5-x}\text{O}_x$  and  $\text{FeN}_4$  catalysts.**

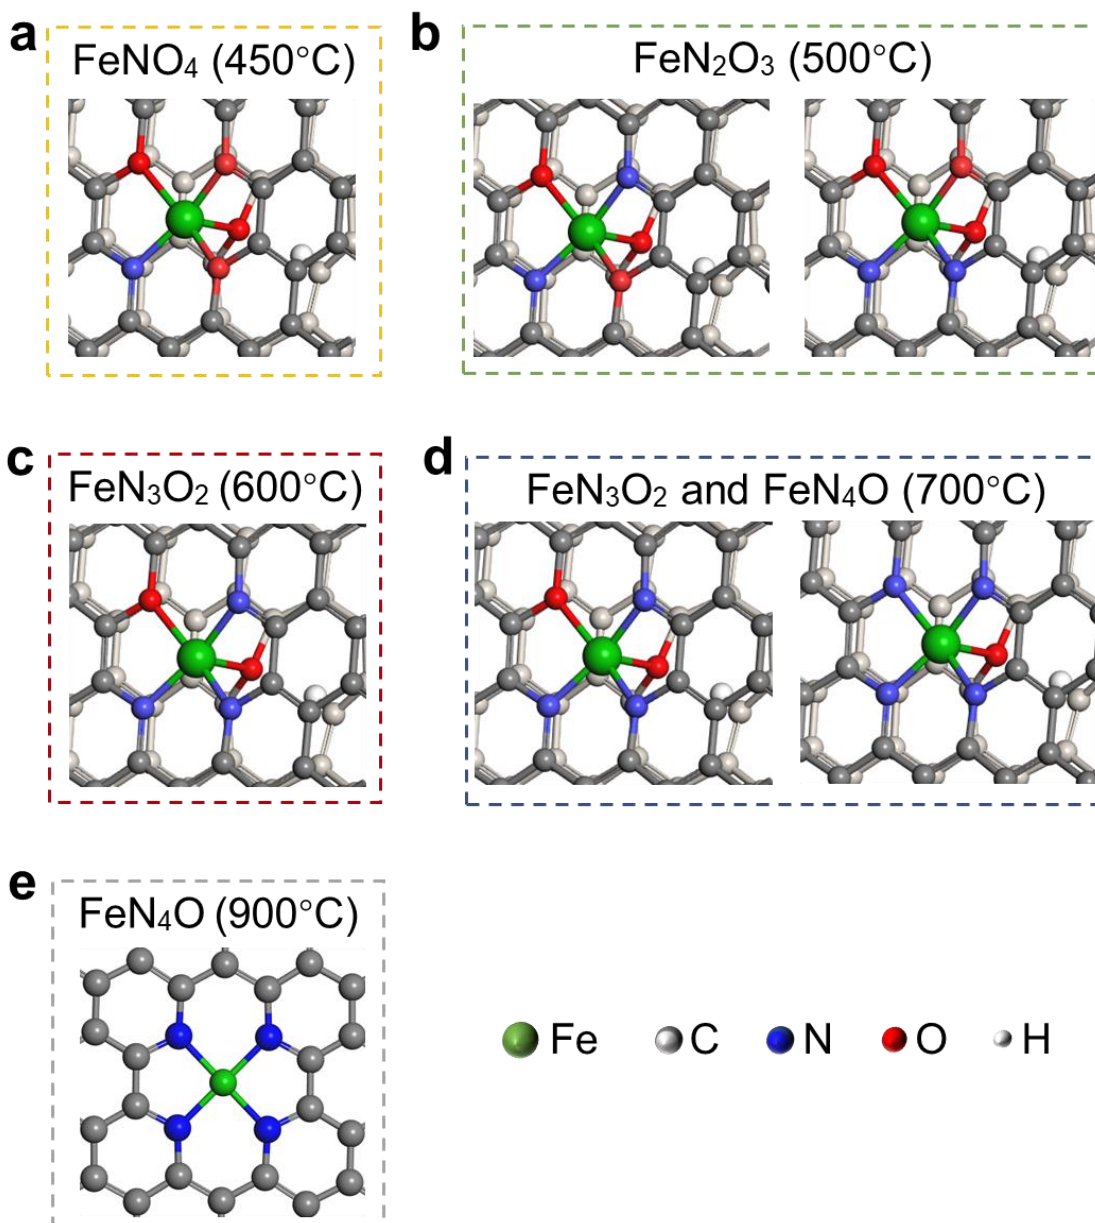

263

264 **Supplementary Figure 31 | Schematic of proposed  $\text{FeN}_{5-x}\text{O}_x$  and  $\text{FeN}_4$  sites. a,  $\text{FeNO}_4$ , b,**

265  **$\text{FeN}_2\text{O}_3$ , c,  $\text{FeN}_3\text{O}_2$ , d,  $\text{FeN}_4\text{O}$ , and e,  $\text{FeN}_4$ .**

266

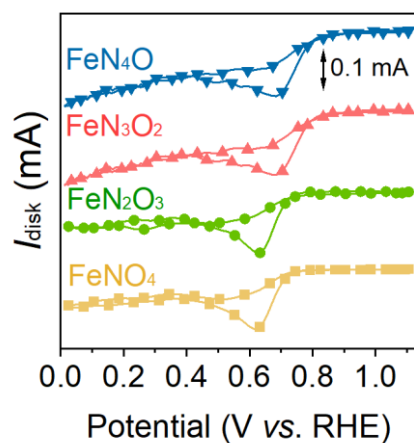

267

268 **Supplementary Figure 32 | ORR intrinsic activity of  $\text{FeN}_{5-x}\text{O}_x$  catalysts.** The ORR peak of  
269  $\text{FeN}_{5-x}\text{O}_x$  catalysts was observed in the cyclic voltammetry in  $\text{O}_2$ -saturated 0.1 M KOH at 0  
270 rpm. And the cyclic voltammetry curves were recorded at a scan rate of  $50 \text{ mV s}^{-1}$ . The  
271 measurements data were corrected for the double layer current using nitrogen saturation  
272 background.

273

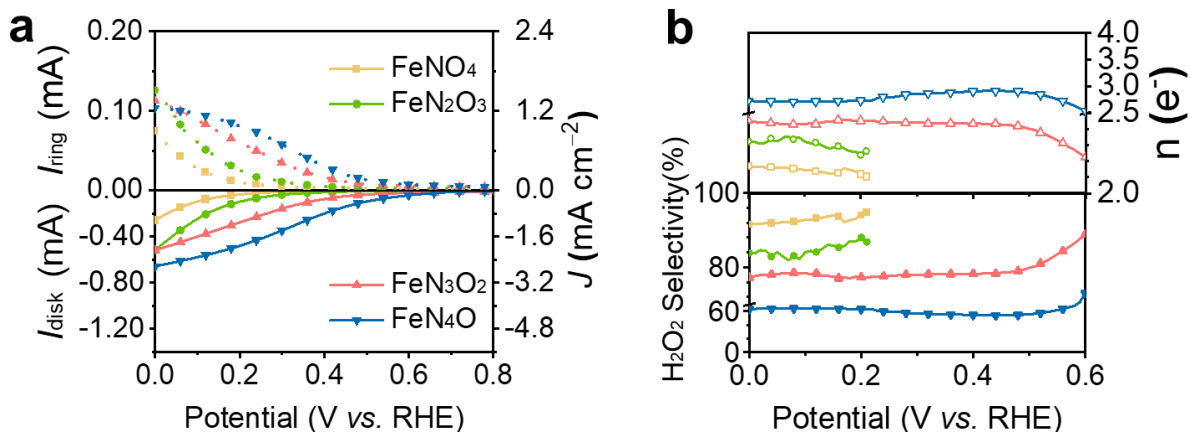

274

275 **Supplementary Figure 33 | ORR performance of FeN<sub>5-x</sub>O<sub>x</sub> catalysts in neutral electrolyte.**

276 **a**, ORR polarization curve measured by a rotating ring-disk electrode at 1600 rpm in O<sub>2</sub>-

277 saturated 0.1 M PBS ( $pH=7.2 \pm 0.1$ ). **b**, Calculated ORR electron transfer number and H<sub>2</sub>O<sub>2</sub>

278 selectivity of FeN<sub>5-x</sub>O<sub>x</sub> catalysts at 0–0.6 V vs. RHE.

279

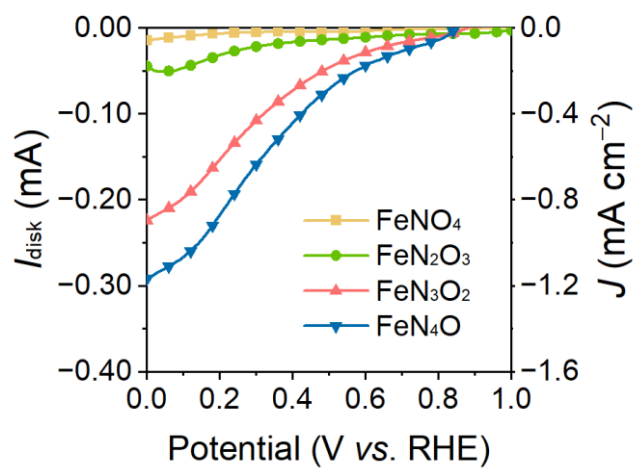

280  
281  
282  
283  
284

**Supplementary Figure 34 | Peroxide reduction reaction for  $\text{FeN}_{5-x}\text{O}_x$  catalysts.** Reduce current measured by a rotating ring-disk electrode at 1600 rpm in  $\text{N}_2$ -saturated 0.1 M KOH ( $\text{pH}=13.0 \pm 0.1$ ) containing 3.5 mM  $\text{H}_2\text{O}_2$ .

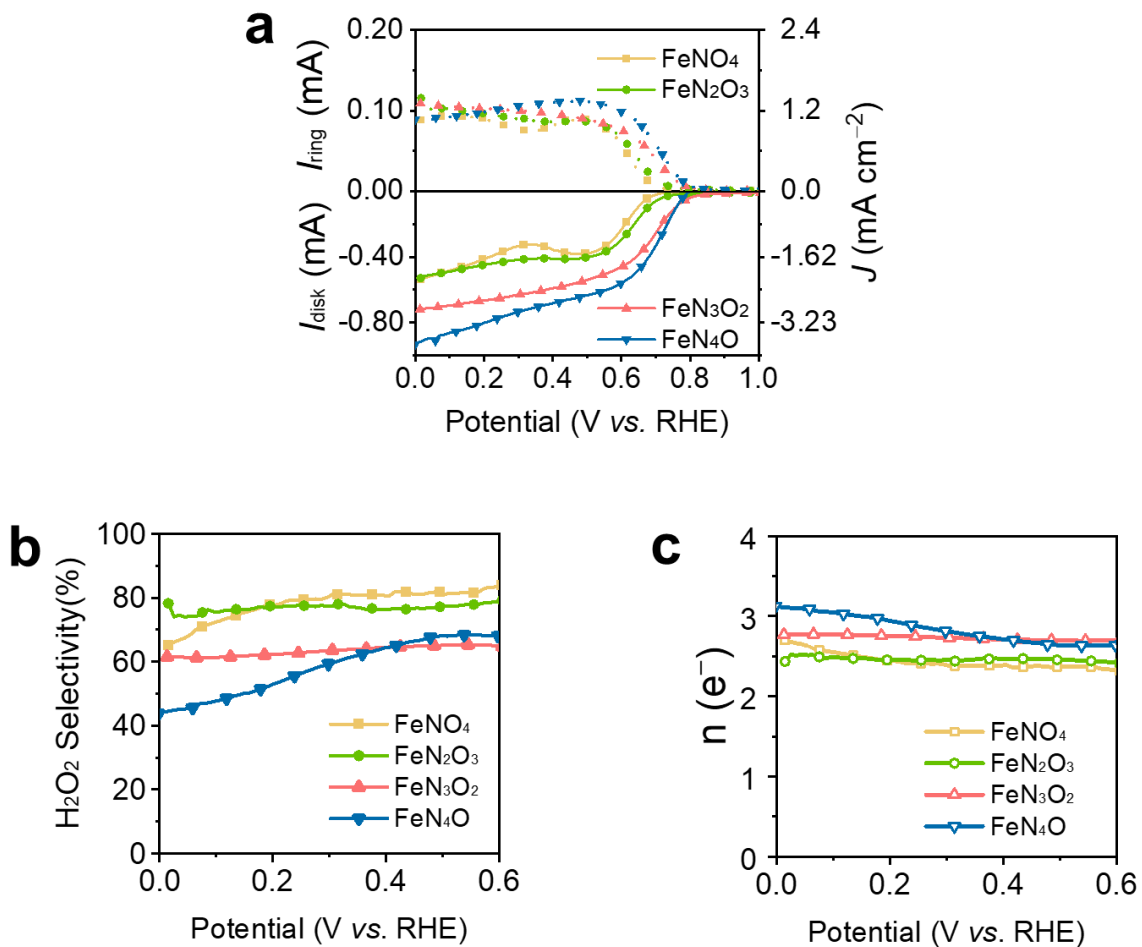

285  
 286  
 287  
 288  
 289  
 290  
 291

**Supplementary Figure 35 | ORR performance of  $\text{FeN}_{5-x}\text{O}_x$  catalysts.** **a**, ORR polarization curve measured by a rotating ring-disk electrode at 1600 rpm in  $\text{O}_2$ -saturated 0.1 M KOH ( $\text{pH}=13.0 \pm 0.1$ ). The absolute mass loading of  $\text{FeN}_{5-x}\text{O}_x$  catalysts on electrode was  $0.4 \text{ mg cm}^{-2}$ . **b**, Calculated ORR electron transfer number and **c**,  $\text{H}_2\text{O}_2$  selectivity of  $\text{FeN}_{5-x}\text{O}_x$  catalysts at 0–0.6 V vs. RHE.

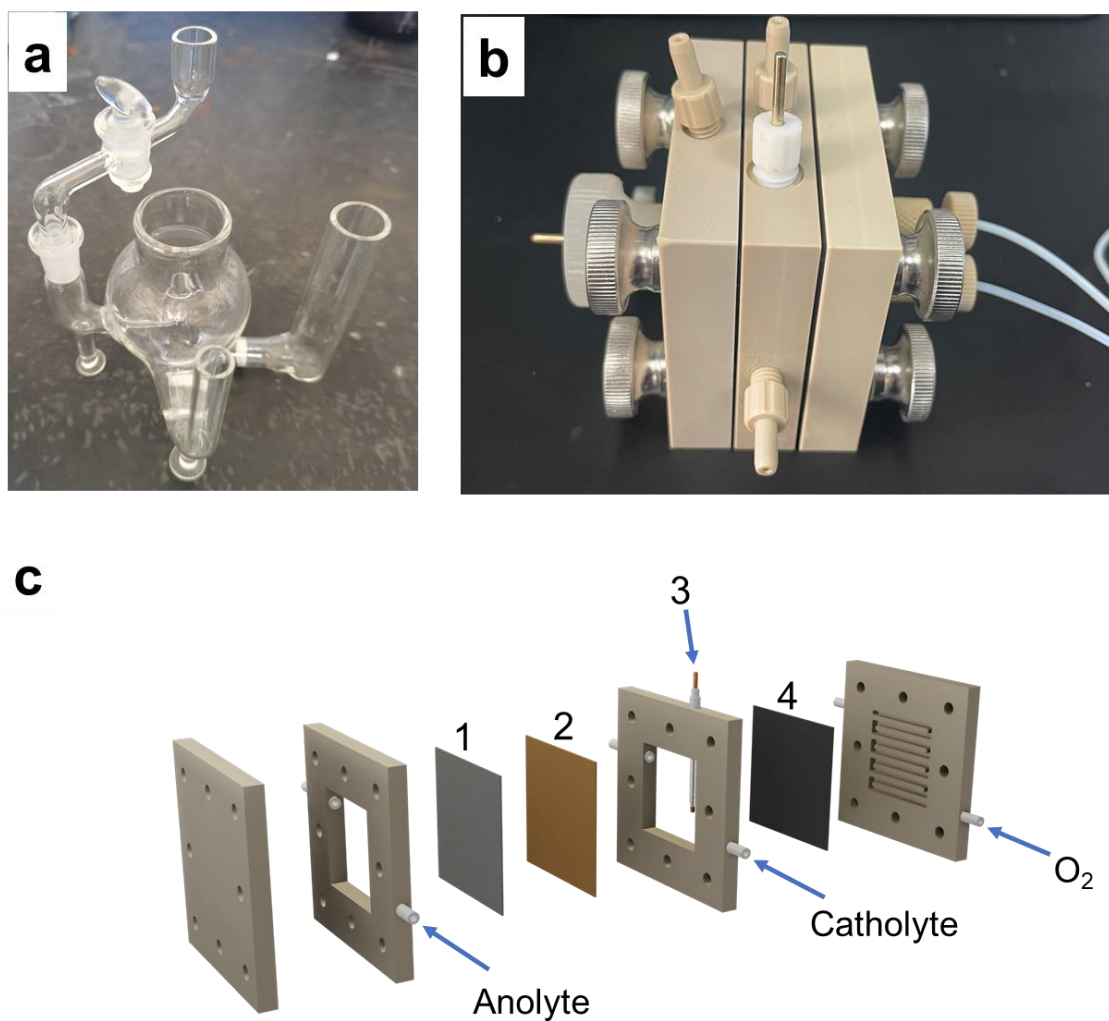

292  
 293 **Supplementary Figure 36 | Electrochemical cell configurations for ORR testing.** **a**, Custom  
 294 three-electrode cell for rotating ring-disk electrode measurements. **b**, Flow Cell Setup. **c**, The  
 295 disassembly diagram of the flow cell components. (1) Nickel foam, (2) Anion exchange  
 296 membrane, (3) Ag|AgCl electrode, (4) Gas diffusion electrode.  
 297



298

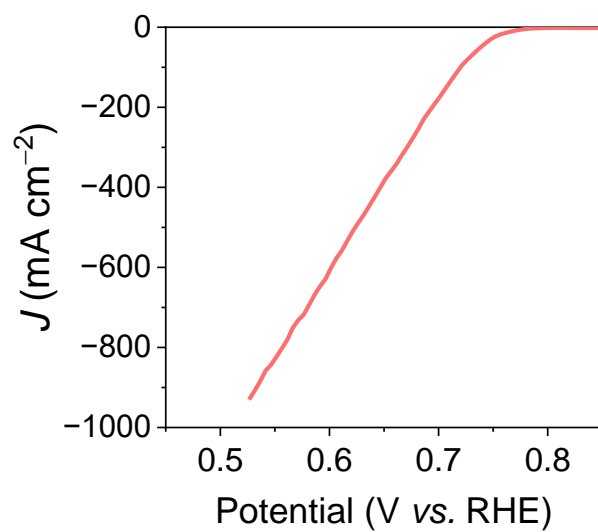

299

300 **Supplementary Figure 37 | Polarization curve of FeN<sub>3</sub>O<sub>2</sub> catalyst on the gas-diffusion**  
301 **electrode in 1 M KOH ( $pH=13.0 \pm 0.1$ ).**

302

303

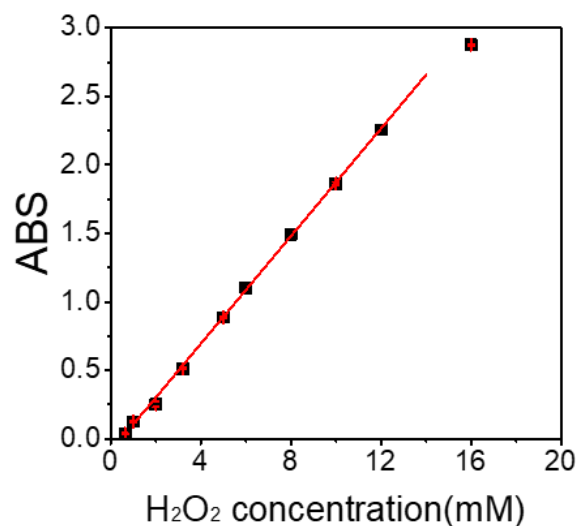

304

305 **Supplementary Figure 38 | Colorimetric method quantified H<sub>2</sub>O<sub>2</sub> concentration.** To ensure  
306 the accuracy of measured H<sub>2</sub>O<sub>2</sub> concentration, the sample was diluted to an absorbance  
307 intensity between 0.5 to 2.00.

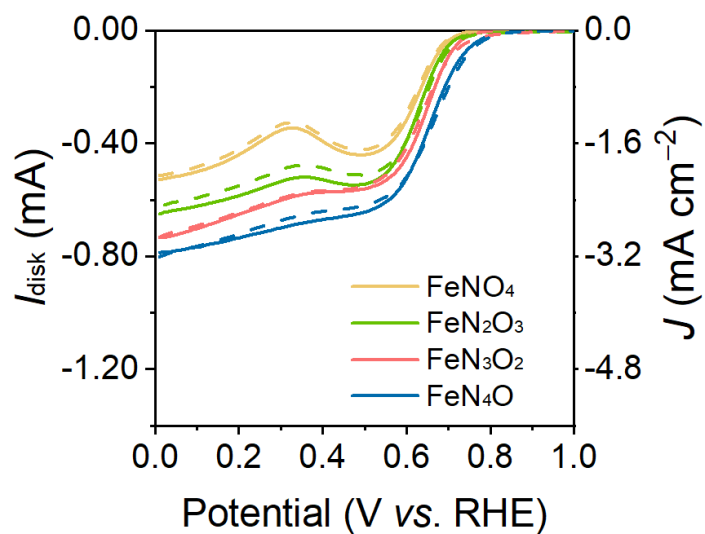

308

309 **Supplementary Figure 39 | The ORR currents catalyzed by FeN<sub>5-x</sub>O<sub>x</sub> catalysts after**  
310 **potassium thiocyanate poisoning.** ORR currents measured by a rotating ring-disk electrode  
311 at 1600rpm in O<sub>2</sub>-saturated 0.1 M KOH ( $pH=13.0 \pm 0.1$ ) contained (dashed line) and  
312 without(solid line) 10 mM KSCN.

313

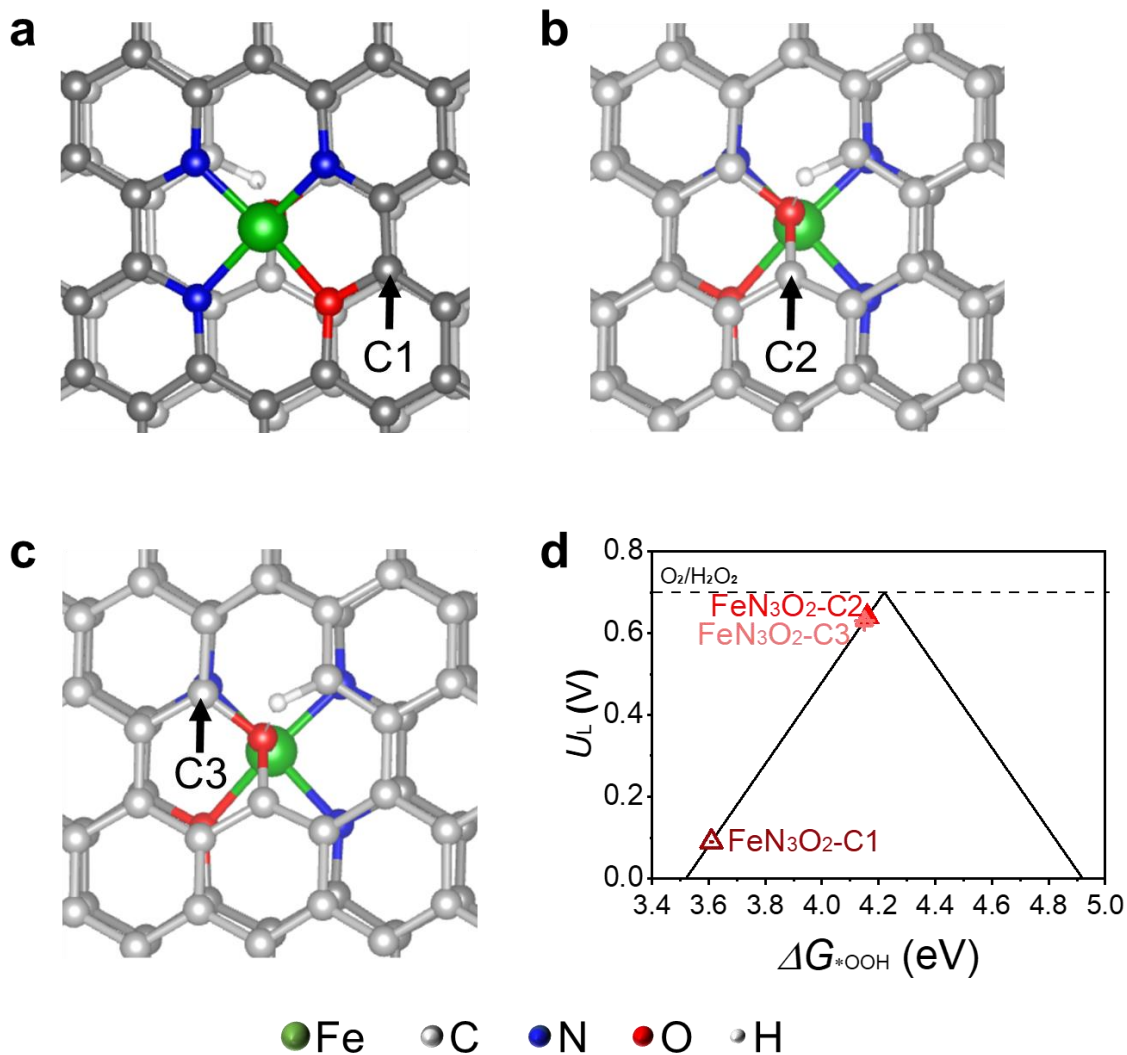

314

315 **Supplementary Figure 40 | Computed activity volcano plots of different reactive sites in**  
 316 **FeN<sub>3</sub>O<sub>2</sub> motif catalyzing the 2e<sup>-</sup> ORR.** **a**, The speculated reactive site of C1. **b**, The  
 317 speculated reactive site of C2. **c**, The speculated reactive site of C3. The speculated reactive  
 318 site in FeN<sub>3</sub>O<sub>2</sub> was annotated with arrow. **d**, The corresponding volcano points of different  
 319 reactive sites in FeN<sub>3</sub>O<sub>2</sub> motif catalyzing the 2e<sup>-</sup> ORR.

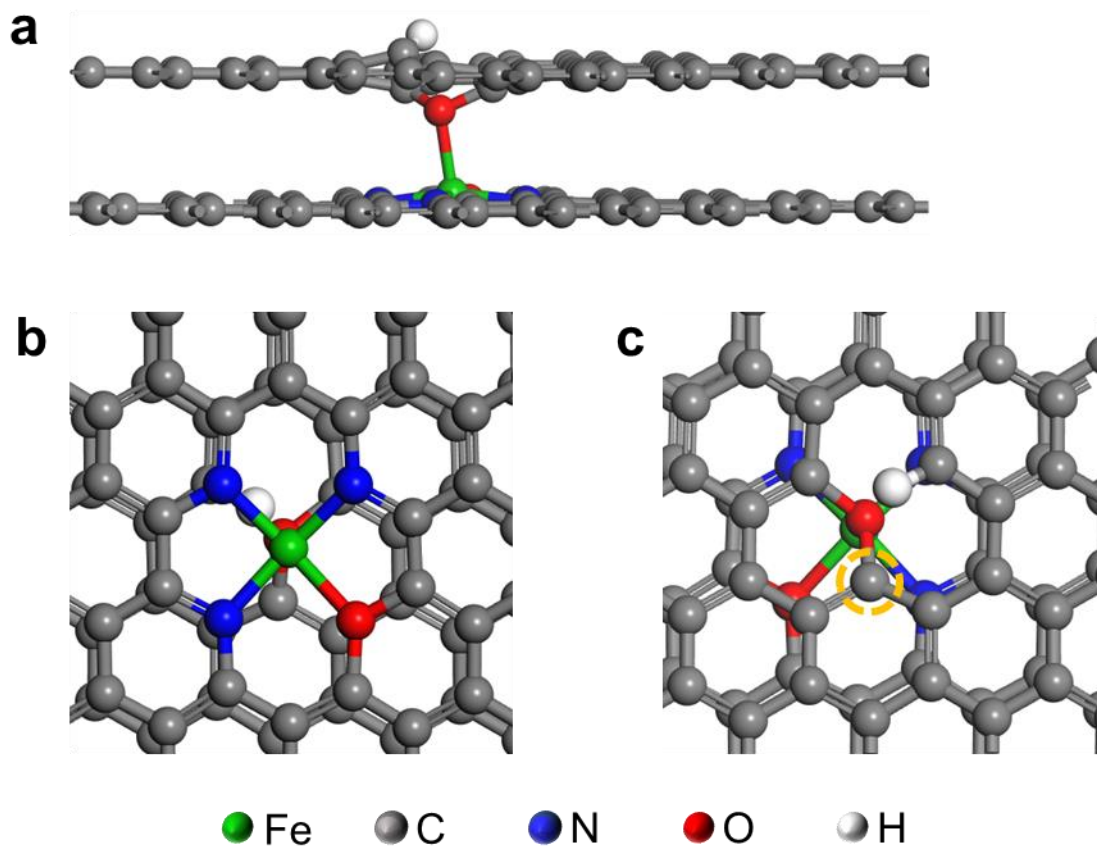

320  
321  
322  
323

**Supplementary Figure 41 | The local structure of  $\text{FeN}_3\text{O}_2$ .** The catalytic site of  $\text{FeN}_3\text{O}_2$  was indicated by the yellow circle. **a**, Left view. **b**, Top view. **c**, Elevation view.

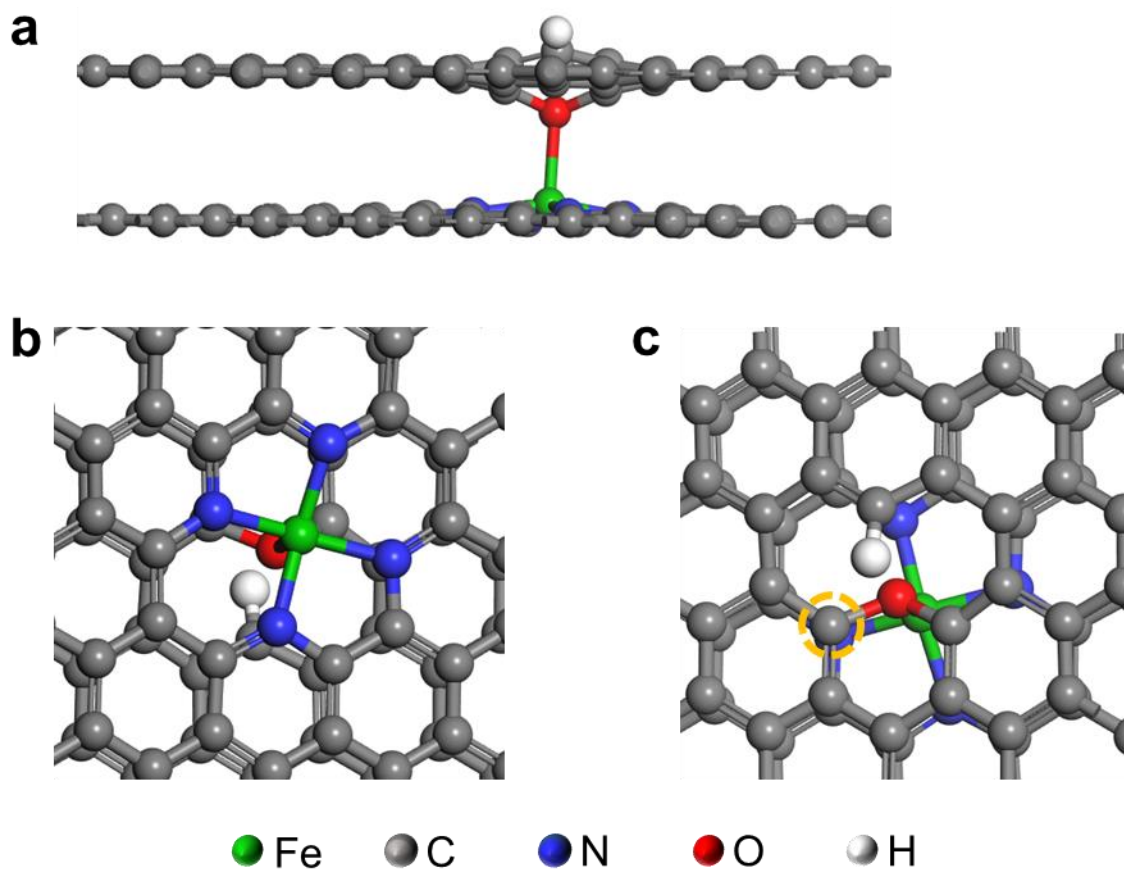

324

325 **Supplementary Figure 42 | The local structure of FeN<sub>4</sub>O.** The catalytic site of FeN<sub>4</sub>O was  
326 indicated by the yellow circle. **a**, Left view. **b**, Top view. **c**, Elevation view.

327

**a**

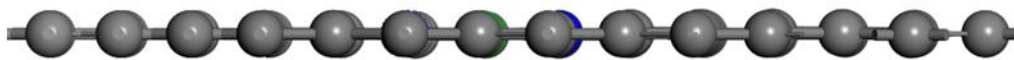

**b**

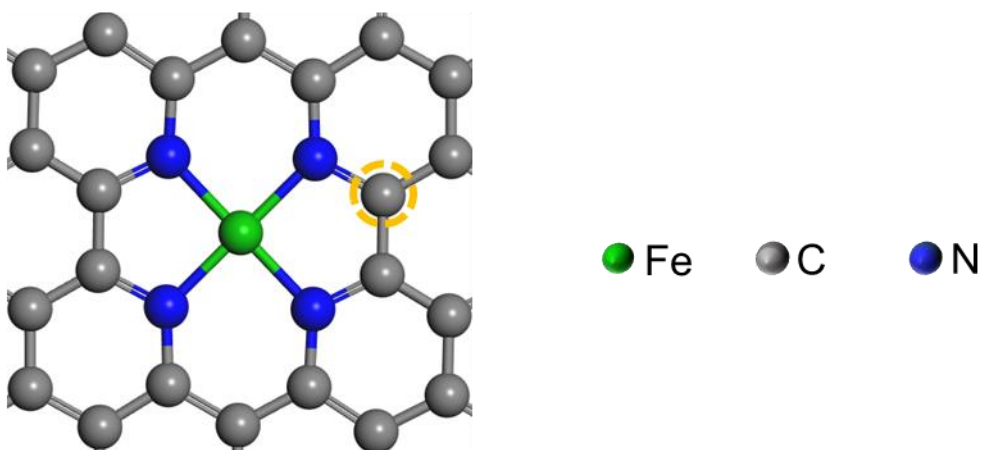

328

329 **Supplementary Figure 43 | The local structure of FeN<sub>4</sub>.** The catalytic site of FeN<sub>4</sub> was  
330 indicated by the yellow circle. **a**, Left view. **b**, Top view.

331

a

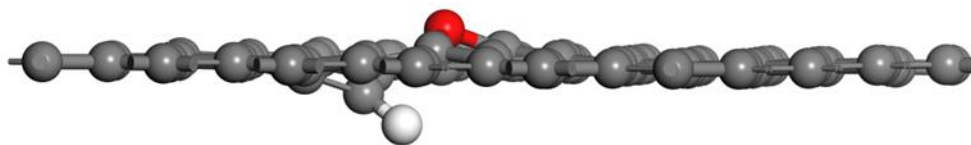

b

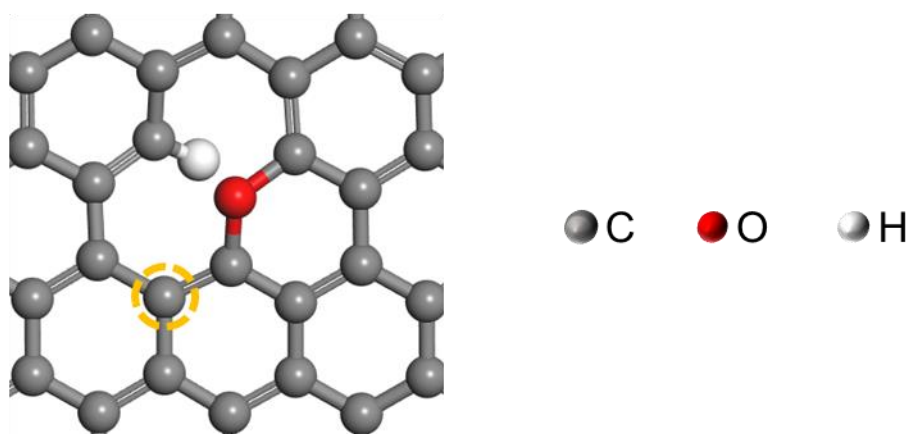

332

333 **Supplementary Figure 44 | The local structure of O/C.** The catalytic site of O/C was  
334 indicated by the yellow circle. **a**, Left view. **b**, Top view.

335



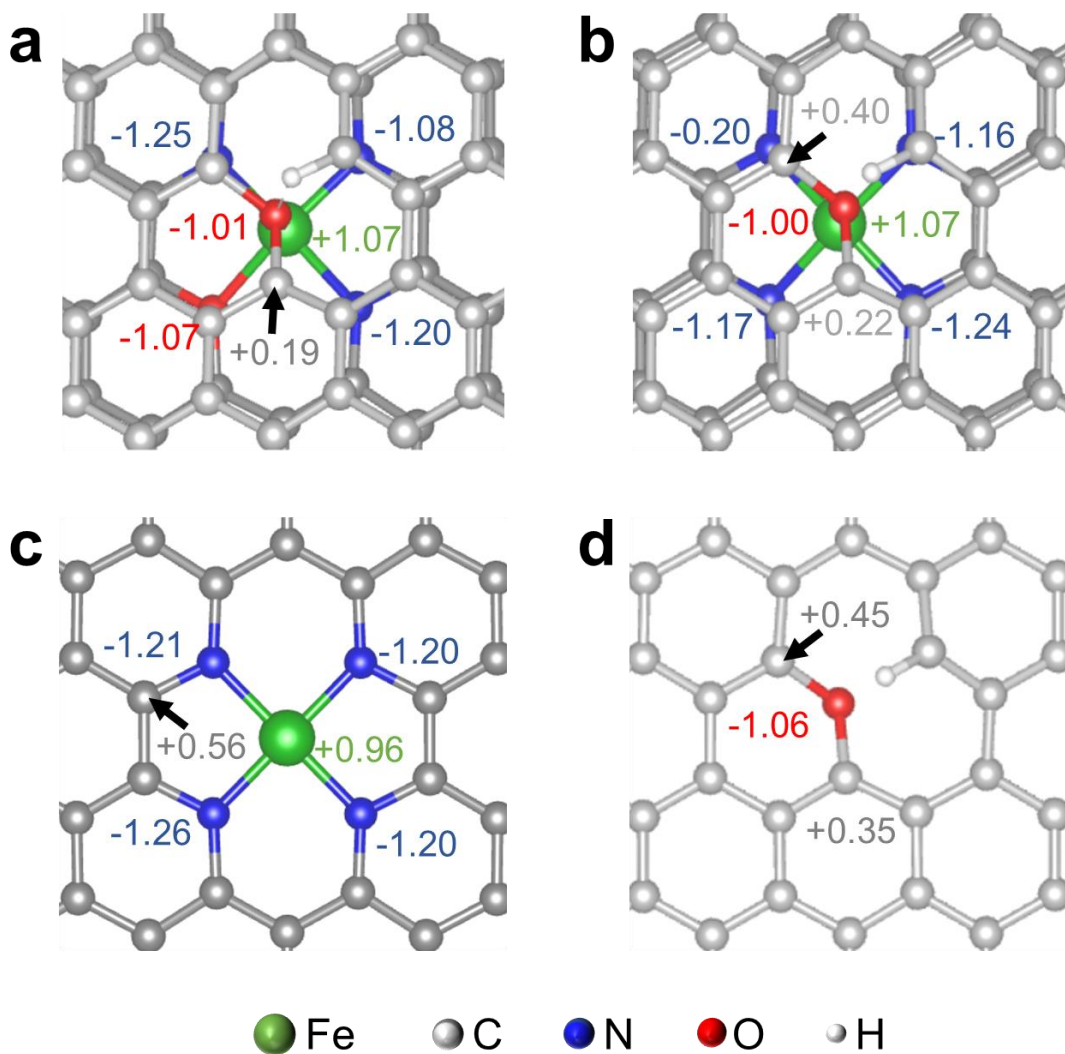

336  
 337 **Supplementary Figure 45 | The differential charge densities of a, FeN<sub>3</sub>O<sub>2</sub>, b, FeN<sub>4</sub>O, c,**  
 338 **FeN<sub>4</sub>, and d, O/C motif.** The corresponding color values next to atoms represent their valence  
 339 electron number.  
 340

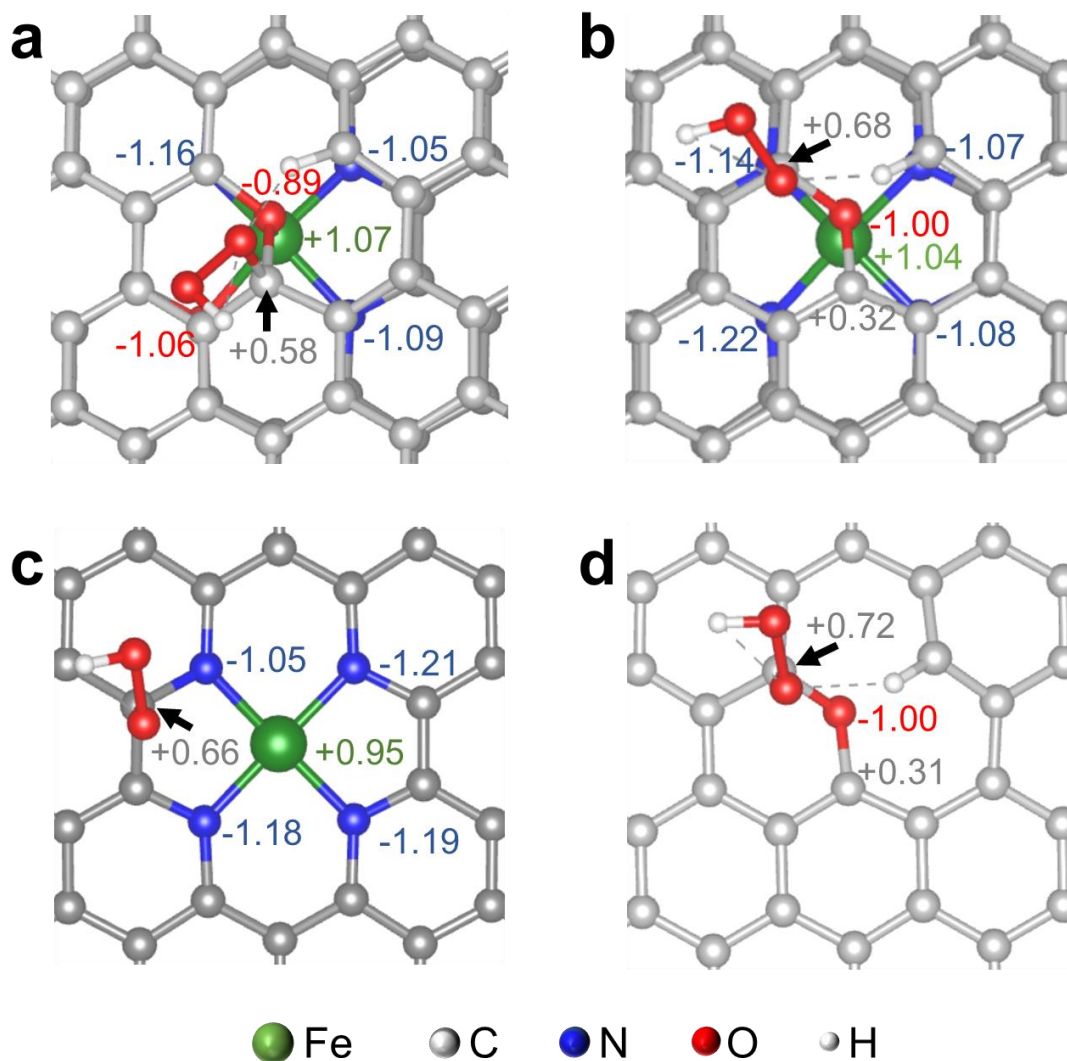

341

342 **Supplementary Figure 46 | The differential charge densities of a, FeN<sub>3</sub>O<sub>2</sub>, b, FeN<sub>4</sub>O, c,**  
 343 **FeN<sub>4</sub>, and d, O/C motif after \*OOH adsorption.** The corresponding color values next to  
 344 atoms represent their valence electron number.

345

**Supplementary Table 1 | Microbial information and cultivated condition.**

| Microorganism                              | 16s/18s sequence | Medium                                                                                                                                                                                                                                                                                                                                                                                                                                                                                                                                                                                       | Cultivated condition       |
|--------------------------------------------|------------------|----------------------------------------------------------------------------------------------------------------------------------------------------------------------------------------------------------------------------------------------------------------------------------------------------------------------------------------------------------------------------------------------------------------------------------------------------------------------------------------------------------------------------------------------------------------------------------------------|----------------------------|
| <i>Escherichia coli</i>                    | EU784137.1       |                                                                                                                                                                                                                                                                                                                                                                                                                                                                                                                                                                                              |                            |
| <i>Shewanella oneidensis</i>               | MN900682.1       |                                                                                                                                                                                                                                                                                                                                                                                                                                                                                                                                                                                              |                            |
| <i>Halomonas titanicae</i>                 | NG063315.1       |                                                                                                                                                                                                                                                                                                                                                                                                                                                                                                                                                                                              |                            |
| <i>Pseudomonas aeruginosa</i>              | NR112116.2       | Luria-Bertani medium <sup>1</sup> (pH = 7.0 ± 0.2):<br>Tryptone, 10.0 g L <sup>-1</sup> ; sodium chloride, 10.0 g L <sup>-1</sup> ; yeast extract, 5.0 g L <sup>-1</sup> .                                                                                                                                                                                                                                                                                                                                                                                                                   | 30 °C,<br>150 rpm,<br>16 h |
| <i>Cupriavidus necator</i>                 | NR043403.1       |                                                                                                                                                                                                                                                                                                                                                                                                                                                                                                                                                                                              |                            |
| <i>Bacillus thuringiensis</i>              | NR116997.1       |                                                                                                                                                                                                                                                                                                                                                                                                                                                                                                                                                                                              |                            |
| <i>Bacillus subtilis</i>                   | NR074798.1       |                                                                                                                                                                                                                                                                                                                                                                                                                                                                                                                                                                                              |                            |
| <i>Bacillus pumilus</i>                    | JQ695937.1       |                                                                                                                                                                                                                                                                                                                                                                                                                                                                                                                                                                                              |                            |
| <i>Saccharomyces cerevisiae</i>            | NR044719.2       |                                                                                                                                                                                                                                                                                                                                                                                                                                                                                                                                                                                              |                            |
|                                            |                  |                                                                                                                                                                                                                                                                                                                                                                                                                                                                                                                                                                                              |                            |
| <i>Lactobacillus acidophilus</i>           | NR043182.1       | MRS medium <sup>2</sup> (pH = 7.0 ± 0.2):<br>Glucose, 20.0 g L <sup>-1</sup> ; tryptone, 10.0 g L <sup>-1</sup> ; beef extract desiccant, 8.0 g L <sup>-1</sup> ; yeast extract, 4.0 g L <sup>-1</sup> ; potassium hydrogen phosphate, 2.0 g L <sup>-1</sup> ; diammonium citrate, 2.0 g L <sup>-1</sup> ; sodium acetate, 5.0 g L <sup>-1</sup> ; magnesium sulfate, 0.2 g L <sup>-1</sup> , manganese chloride, 0.05 g L <sup>-1</sup> ; polysorbate-80, 1.0 mL L <sup>-1</sup> .                                                                                                          | 37 °C,<br>0 rpm,<br>48 h   |
| <i>Eubacterium limosum</i>                 | NR026078.1       | Customized medium (pH = 7.0 ± 0.2):<br>Yeast extract, 20.0 g L <sup>-1</sup> ; sodium DL-lactate, 7.7 mL L <sup>-1</sup> ; tryptone, 5.0 g L <sup>-1</sup> ; potassium dihydrogen phosphate, 2.0 g L <sup>-1</sup> ; cysteine, 10.0 g L <sup>-1</sup> ;                                                                                                                                                                                                                                                                                                                                      | 30 °C,<br>150 rpm,<br>16 h |
| <i>Bacillus pumilus</i> (Fe <sup>-</sup> ) |                  | Iron-free minimal medium <sup>3</sup> (pH = 7.5 ± 0.2):<br>Ammonium sulfate, 2.0 g L <sup>-1</sup> ; potassium chloride, 2.0 g L <sup>-1</sup> ; magnesium sulfate heptahydrate, 1.0 g L <sup>-1</sup> ; sodium acetate, 1.0 g L <sup>-1</sup> ;<br>50 mM tri(hydroxymethyl) amino methane hydrochloride (pH = 7.5) supplemented with 2.2 g L <sup>-1</sup> manganese sulphate tetrahydrate, 2.0 g L <sup>-1</sup> glucose, 0.7 g L <sup>-1</sup> glutamate, 0.2 g L <sup>-1</sup> potassium dihydrogen phosphate, 0.2 g L <sup>-1</sup> calcium chloride, and 10 µL L <sup>-1</sup> biotic. | 30 °C,<br>150 rpm,<br>16 h |

---

**Supplementary Table 2 | Estimates of evolutionary divergence between sequences**

|                                     | 1      | 2      | 3      | 4      | 5      | 6      | 7      | 8      | 9      | 10     |
|-------------------------------------|--------|--------|--------|--------|--------|--------|--------|--------|--------|--------|
| 1. <i>Escherichia coli</i>          |        | 0.0202 | 0.0269 | 0.0246 | 0.0304 | 0.0402 | 0.0402 | 0.0371 | 0.0369 | 0.0394 |
| 2. <i>Shewanella oneidensis</i>     | 0.1635 |        | 0.0259 | 0.0248 | 0.0278 | 0.0398 | 0.0389 | 0.0355 | 0.0365 | 0.0388 |
| 3. <i>Halomonas titanicae</i>       | 0.2606 | 0.2407 |        | 0.0254 | 0.0296 | 0.0394 | 0.0374 | 0.0356 | 0.0361 | 0.0375 |
| 4. <i>Pseudomonas aeruginosa</i>    | 0.2225 | 0.2343 | 0.2212 |        | 0.0277 | 0.0380 | 0.0377 | 0.0365 | 0.0357 | 0.0377 |
| 5. <i>Cupriavidus necator</i>       | 0.3350 | 0.2970 | 0.2894 | 0.2759 |        | 0.0397 | 0.0377 | 0.0360 | 0.0351 | 0.0377 |
| 6. <i>Eubacterium limosum</i>       | 0.4700 | 0.4608 | 0.4445 | 0.4439 | 0.4690 |        | 0.0330 | 0.0304 | 0.0300 | 0.0317 |
| 7. <i>Lactobacillus acidophilus</i> | 0.4798 | 0.4513 | 0.4133 | 0.4535 | 0.4524 | 0.3712 |        | 0.0271 | 0.0274 | 0.0292 |
| 8. <i>Bacillus thuringiensis</i>    | 0.4310 | 0.4156 | 0.3911 | 0.4274 | 0.4395 | 0.3139 | 0.2470 |        | 0.0168 | 0.0191 |
| 9. <i>Bacillus subtilis</i>         | 0.4502 | 0.4351 | 0.3990 | 0.4253 | 0.4259 | 0.3005 | 0.2481 | 0.1098 |        | 0.0130 |
| 10. <i>Bacillus pumilus</i>         | 0.4555 | 0.4427 | 0.4027 | 0.4179 | 0.4265 | 0.3212 | 0.2683 | 0.1320 | 0.0631 |        |
| 11. <i>Saccharomyces cerevisiae</i> | 1.4445 | 1.3765 | 1.3994 | 1.4012 | 1.3391 | 1.2942 | 1.4067 | 1.3615 | 1.3911 | 1.3810 |

The number of amino acid substitutions per site from between sequences were shown below the diagonal.. Standard error estimate(s) were shown above the diagonal. Analyses were conducted using the Poisson correction model<sup>4</sup>. This analysis involved 11 amino acid sequences. The coding data was translated assuming a Standard genetic code table. All ambiguous positions were removed for each sequence pair (pairwise deletion option). There were a total of 503 positions in the final dataset. Evolutionary analyses were conducted in MEGA11<sup>5</sup>.

**Supplementary Table 3 | The BET surface area and pore distribution of *Bacillus pumilus*-derived carbon materials obtained at different temperatures.**

|                                                                                       | 450°C  | 500°C  | 600°C  | 700°C  | 900°C  |
|---------------------------------------------------------------------------------------|--------|--------|--------|--------|--------|
| BET Surface Area (m <sup>2</sup> g <sup>-1</sup> )                                    | 33.09  | 35.80  | 88.43  | 112.41 | 452.73 |
| Single point adsorption total pore volume of pores (cm <sup>3</sup> g <sup>-1</sup> ) | 0.081  | 0.076  | 0.068  | 0.130  | 0.348  |
| t-Plot micropore volume (cm <sup>3</sup> g <sup>-1</sup> )                            | 0.0004 | 0.0044 | 0.0307 | 0.0247 | 0.1346 |
| Total pore volume of mesopores and macropores (cm <sup>3</sup> g <sup>-1</sup> )      | 0.080  | 0.071  | 0.037  | 0.105  | 0.213  |
| BJH Desorption average pore diameter (4V/A) (nm)                                      | 32.0   | 31.5   | 16.1   | 13.6   | 11.5   |

The total volume of mesopores and macropores is calculated as single point adsorption total pore volume of pores minus b

**Supplementary Table 4 | The fitting parameters for Fe K-edge EXAFS of *Bacillus pumilus*-derived carbon materials obtained at different temperatures using FeN<sub>3</sub>O<sub>2</sub> model.**

| Sample            | Path | CN      | Reff (Å) | R (Å) | $\sigma^2$ (Å <sup>2</sup> ) | E <sub>0</sub> (eV) | R Factor |
|-------------------|------|---------|----------|-------|------------------------------|---------------------|----------|
| Without pyrolysis | Fe–N | 2.3±2.5 | 1.93     | 1.89  | 0.000                        | –3.22±9.97          | 0.032    |
|                   | Fe–O | 4.2±3.0 | 2.09     | 2.01  | 0.001                        |                     |          |
| 450°C             | Fe–N | 1.2±2.2 | 1.93     | 1.88  | 0.000                        | –2.95±12.31         | 0.009    |
|                   | Fe–O | 4.0±3.1 | 2.09     | 2.01  | 0.003                        |                     |          |
| 500°C             | Fe–N | 2.0±1.6 | 1.93     | 1.90  | 0.000                        | –0.81±5.72          | 0.002    |
|                   | Fe–O | 3.2±2.3 | 2.09     | 2.03  | 0.001                        |                     |          |
| 600°C             | Fe–N | 3.0±3.8 | 1.93     | 1.96  | 0.001                        | –4.80±10.05         | 0.126    |
|                   | Fe–O | 1.9±2.4 | 2.09     | 2.00  | 0.003                        |                     |          |
| 700°C             | Fe–N | 3.4±6.4 | 1.93     | 1.98  | 0.002                        | –0.53±4.15          | 0.001    |
|                   | Fe–O | 1.4±5.0 | 2.09     | 2.06  | 0.005                        |                     |          |
| 900°C             | Fe–N | 4.4±0.4 | 1.93     | 2.01  | 0.006                        | 2.72±1.97           | 0.032    |

$\Delta E_0$  was refined as a global fit parameter, returning a value of  $(-3 \pm 1)$  eV. Data ranges:  $2.5 \leq k \leq 10.5 \text{ \AA}^{-1}$ ,  $1 \leq R \leq 2 \text{ \AA}$ . The distances for Fe–N and Fe–O were from the FEFF file of structure in Supplementary Figure 28.

---

**Supplementary Table 5 | Free energy for O<sub>2</sub>, H<sub>2</sub>O and H<sub>2</sub>.**

|                               | <i>E</i> (eV) | <i>ZPE+U-TS</i> (eV) | <i>G</i> (eV) |
|-------------------------------|---------------|----------------------|---------------|
| O <sub>2</sub>                | –             | –                    | –9.77         |
| H <sub>2</sub> O              | –14.21        | 0.08                 | –14.14        |
| H <sub>2</sub>                | –6.75         | –0.04                | –6.79         |
| H <sub>2</sub> O <sub>2</sub> | –             | –                    | –17.96        |

In this work, free energy for O<sub>2</sub>, H<sub>2</sub>O and H<sub>2</sub> used as computed traditionally.

---

## Supplementary References

1. Sezonov, G., Joseleau-Petit, D. & D'Ari, R. *Escherichia coli* physiology in Luria-Bertani broth. *J. Bacteriol.* **189**, 8746–8749 (2007).
2. De Man, J.C., Rogosa, M. & Sharpe, M.E. A medium for the cultivation of lactobacilli. *J. Appl. Bacteriol.* **23**, 130–135 (1960).
3. Handtke, S. et al. *Bacillus pumilus* reveals a remarkably high resistance to hydrogen peroxide provoked oxidative stress. *PLoS One* **9**, e85625 (2014).
4. Zuckerkandl, E. & Pauling, L. in *Evolving genes and proteins* (eds. Bryson, V. & Vogel, H.J.) 97–166 (Academic Press, 1965).
5. Tamura, K., Stecher, G. & Kumar, S. MEGA11: molecular evolutionary genetics analysis version 11. *Mol. Biol. Evol.* **38**, 3022–3027 (2021).
