# Supplementary material for: Topological transformation of microbial proteins into iron single-atom sites for selective hydrogen peroxide electrosynthesis
Source: PubMed Central journal article supplement — Nat Commun. 2024 Dec 30;15:10758. doi: 10.1038/s41467-024-55041-z (PMC11685441; doi:10.1038/s41467-024-55041-z), 2024-12-30
Supplement: 41467_2024_55041_MOESM2_ESM.pdf [file 41467_2024_55041_MOESM2_ESM.pdf]

## **Description of Additional Supplementary Files**

**Supplementary Data 1.** Supplementary data file of the atomic coordinates of the optimized computational models.
